1 Single nucleus RNA-sequencing reveals altered intercellular communication and dendritic cell  
2 activation in nonobstructive hypertrophic cardiomyopathy

3

4 Christina J. Codden<sup>1</sup>, Amy Larson<sup>1</sup>, Junya Awata<sup>1</sup>, Gayani Perera<sup>1</sup> and Michael T. Chin<sup>1,2,\*</sup>

5

6

7 <sup>1</sup>Molecular Cardiology Research Institute, Tufts Medical Center, Boston, MA, USA

8 <sup>2</sup>Hypertrophic Cardiomyopathy Center, Tufts Medical Center, Boston, MA, USA

9

10

11

12 \*To whom correspondence should be addressed

13

14 Michael T. Chin, MD, PhD

15 Molecular Cardiology Research Institute

16 Tufts Medical Center

17 800 Washington Street, Box 80

18 Boston, MA 02111

19 T: 617 636 8776

20 F: 617 636 5999

21

22 The authors have declared that no conflict of interest exists.

23 **Abstract**

24 End stage, nonobstructive hypertrophic cardiomyopathy (HCM) is an intractable condition with  
25 no disease-specific therapies. To gain insights into the pathogenesis of nonobstructive HCM, we  
26 performed single nucleus RNA-sequencing (snRNA-seq) on human HCM hearts explanted at the  
27 time of cardiac transplantation and organ donor hearts serving as controls. Differential gene  
28 expression analysis revealed 64 differentially expressed genes linked to specific cell types and  
29 molecular functions. Analysis of ligand-receptor pair gene expression to delineate potential  
30 intercellular communication revealed significant reductions in expressed ligand-receptor pairs  
31 affecting the extracellular matrix, growth factor binding, peptidase regulator activity, platelet-  
32 derived growth factor binding and protease binding in the HCM tissue. Changes in Integrin- $\beta$ 1  
33 receptor expression were responsible for many changes related to extracellular matrix  
34 interactions, by increasing in dendritic, smooth muscle and pericyte cells while decreasing in  
35 endothelial and fibroblast cells, suggesting potential mechanisms for fibrosis and microvascular  
36 disease in HCM and a potential role for dendritic cells. In contrast, there was an increase in  
37 ligand-receptor pair expression associated with adenylate cyclase binding, calcium channel  
38 molecular functions, channel inhibitor activity, ion channel inhibitor activity, phosphatase  
39 activator activity, protein kinase activator activity and titin binding, suggesting important shifts  
40 in various signaling cascades in nonobstructive, end stage HCM.

41

42 **Brief summary**

43 End stage, nonobstructive human HCM is associated with altered intercellular communication  
44 and dendritic cell activation, providing novel insights into potential disease mechanisms.

45 **Introduction**

46

47 Hypertrophic Cardiomyopathy (HCM) is an inherited disorder characterized by unexplained left  
48 ventricular hypertrophy, often asymmetric, often involving the interventricular septum, often  
49 associated with left ventricular outflow tract (LVOT) obstruction, fibrosis, microvascular  
50 occlusion, and sudden cardiac death. Genetic studies have identified numerous causal  
51 mutations in a variety of sarcomere genes such as *MYH7*, *MYL2*, *MYL3*, *MYBPC3*, *TNNT2*, *TNNI3*  
52 and *TPM1*, leading to the concept that HCM is a disease of the sarcomere <sup>1</sup>, but genetic testing  
53 is only informative in approximately 30% of probands, indicating that other genes and factors  
54 significantly contribute to the HCM phenotype. Recently, it has been recognized that in most  
55 cases HCM can be considered polygenic with multiple loci contributing to the phenotype or in  
56 some cases acting as modifiers of existing sarcomere mutations, by affecting modifiable risk  
57 factors such as diastolic blood pressure <sup>2-4</sup>. Patients with sarcomere gene mutations have been  
58 found to have more adverse events than those without sarcomere mutations <sup>5</sup>, thus implicating  
59 a need for better understanding of distinct pathogenic steps in these two groups. The  
60 development of fibrosis is associated with an increased risk of sudden cardiac death and is a  
61 poor prognostic factor <sup>6-11</sup>. Excess deposition of extracellular matrix (ECM) proteins can cause  
62 cardiac stiffening, which can impede contraction <sup>6</sup>. It can additionally disrupt electrical coupling,  
63 heightening patient susceptibility to arrhythmogenesis. In the end-stages of disease, fibrosis  
64 replaces up to 50% of the myocardium and is a key determinant of patient outcome <sup>9-11</sup>.

65

66 Although LVOT obstruction is common and easily treatable in HCM, a subset of patients with  
67 nonobstructive HCM develop progressive, symptomatic heart failure, despite guideline directed  
68 medical therapy, often leading to heart transplantation<sup>12</sup>. Histopathological features include  
69 myocyte hypertrophy, fibrosis, myocyte disarray and microvascular disease and are common  
70 with obstructive HCM. The genetic profiles of patients with nonobstructive HCM are also  
71 indistinguishable from those with obstructive HCM, raising questions about the sources of  
72 asymmetric hypertrophy. Human tissue for study of nonobstructive HCM can only be obtained  
73 postmortem or at the time of heart transplantation or other cardiac procedure.

74

75 Single cell and single nucleus transcriptomic analysis have facilitated an understanding of  
76 cellular phenotypes and interactions occurring in complex tissues such as the heart and high  
77 quality datasets of the normal human heart have been published<sup>13-15</sup>. We have recently  
78 performed single nucleus RNA-seq analysis of obstructive HCM and found significant alterations  
79 in intercellular communication pathways that affect the extracellular matrix, involving integrin-  
80  $\beta$ 1, thus providing a potential mechanism linking sarcomere dysfunction to extracellular matrix  
81 signaling<sup>16</sup>. Here, we analyze single nucleus transcriptomes in tissue from nonobstructive, end  
82 stage HCM and compare with normal tissue. As with obstructive HCM, we find that alterations  
83 in intercellular communication pathways affecting the extracellular matrix involve integrin- $\beta$ 1,  
84 but there are additional alterations in communication between fibroblasts, vascular cells, and  
85 dendritic cells not seen in obstructive HCM. In addition, there are increases in various molecular  
86 functions associated with adenylate cyclase signaling, ion channel function, protein  
87 phosphatase and protein kinase activity, suggesting a unique intercellular signaling milieu

88 specific to nonobstructive HCM. These findings have important implications for the  
89 development of novel therapies for nonobstructive HCM.

90

## 91 **Results**

### 92 **Patient characteristics**

93 Explanted heart tissue was obtained from six HCM patients with severely symptomatic,  
94 nonobstructive, end stage disease who underwent cardiac transplantation. Patient  
95 characteristics are summarized in Table 1. Patients gave informed consent for their heart tissue  
96 to be used in research. The patients varied in age from 25 to 67. Five of six patients were  
97 female. Two of the patients carried pathogenic MYH7 mutations and the remaining four  
98 patients had no known mutations pathogenic for HCM. Four organ donors and datasets for the  
99 normal human IVS have been previously described<sup>15</sup> and are summarized in Table 2 with the  
100 two additional donors used in this study.

101

### 102 **Nonobstructive HCM IVS tissue reveals extensive cardiomyocyte and fibroblast diversity**

103 After sequencing and initial data processing with Cell Ranger software<sup>17</sup>, each sample dataset  
104 was processed further to remove called nuclei that were likely droplets with ambient RNA, or  
105 droplets that contained two nuclei. The six HCM datasets and six donor heart datasets were  
106 combined into one dataset using the Seurat Integration function<sup>18</sup>. The final combined dataset  
107 included 49010 nuclei from nonobstructive HCM hearts and 34358 nuclei from donor hearts.  
108 Clustering of the integrated dataset revealed 22 cell populations within the IVS which was  
109 visualized using the dimensionality reduction algorithm uniform manifold approximation and

110 projection (UMAP, Fig. 1A). Each point represents a single nucleus colored by cluster identity.  
111 Visualizing the integrated dataset by Normal and HCM datasets reveals that all 22 clusters are  
112 present in each condition and all samples contribute to all clusters (Fig. 1B, C, D). No cell  
113 populations (i.e., clusters) were specific to either condition.  
114  
115 Cell identities were assigned to each cluster using known gene markers of expected cell types,  
116 differentially expressed genes queried against panglaoDB <sup>19</sup>, gene ontology (GO) using GOstats  
117 <sup>20</sup>, and Ingenuity Pathway Analysis <sup>21</sup>. Supplemental Table 1 lists the gene markers used to  
118 identify each cell type. Supplemental Table 2 lists the consensus cell identity assignment using  
119 all four methods. Upon assigning cell types, we found that similar cell types expressed similar  
120 markers and the associated clusters were expectedly positioned close to each other in UMAP  
121 space (Fig. 2A, B). Interestingly, we see ten cardiomyocyte populations (i.e., clusters) and six  
122 fibroblast populations, revealing significant cardiomyocyte and fibroblast diversity in the IVS  
123 (Fig. 2A, 2B), consistent with previous reports <sup>15, 16</sup>. Other cell types identified included  
124 endothelial, smooth muscle, pericyte, neuronal, leukocyte, and dendritic cell populations.  
125 Among normal donor heart samples, assigned cardiomyocytes made up approximately 48.5% of  
126 the total cell population. Similarly, among nonobstructive HCM samples cardiomyocytes made  
127 up approximately 55.0% of the total cell population. Noncardiomyocytes make up the  
128 remaining cell population. Nonobstructive HCM does not appear to be associated with a shift in  
129 the relative proportion of cells in the heart.

130

131 **Trajectory analysis and differential gene expression analysis reveal nonobstructive HCM-**  
132 **associated perturbations**

133 Clustering analysis revealed diversity of both cardiomyocytes and fibroblasts. To gain insight  
134 into the potential relationships among the different cell populations for each cell type, clusters  
135 were projected onto pseudotime trajectory analysis using Monocle3<sup>22</sup>. Trajectory analysis was  
136 performed on Normal cells only, nonobstructive HCM cells only, and both conditions combined  
137 for each of the 8 cell types identified in the above analysis. In single-cell trajectory analysis, a  
138 trajectory is a computed path that describes a cell type's biological progression through a  
139 dynamic process. Prior to building trajectory paths, the root node, or beginning, of each  
140 trajectory path was determined through hierarchical clustering of our single nuclei data by cell  
141 type. Then, trajectory paths for each assigned cell type (assigned in Seurat) were constructed in  
142 UMAP space using Monocle3 with Normal and HCM data together and individually. Once  
143 trajectory paths were established, pseudotime could be assigned to each cell. For all cell types,  
144 root nodes showed consistent placement among Normal only groups, HCM only groups, and  
145 Normal and HCM groups. Trajectory paths also showed similar basic structures among Normal  
146 only groups, HCM only groups, and Normal and HCM group (data not shown). Therefore, we  
147 were not able to distinguish any meaningful changes among trajectory paths. These findings  
148 suggest that the relationships between the various subtypes of each cell type do not vary  
149 significantly in nonobstructive HCM heart tissue in comparison to Normal heart tissue, as we  
150 have reported for obstructive HCM<sup>16</sup>.

151

152 Establishment of trajectories facilitates the analysis of differential gene expression along the  
153 trajectory and between conditions along the trajectory. We analyzed differential gene  
154 expression for each cell type along their trajectories for the Normal and HCM populations.  
155 Differential expression analysis between Normal and HCM cells by assigned cell type and cluster  
156 was performed in which generalized linear regression models were fit for each gene. Resulting  
157 coefficients were tested for significant differences from zero, with an adjusted p-value cutoff  
158  $\leq 0.05$  using the Wald Test. No differentially expressed genes were detected by this method.

159  
160 Differential gene expression can also be analyzed along trajectory paths in UMAP space through  
161 spatial autocorrelation. Moran's I statistic and adjusted p-values were calculated for each gene  
162 in Normal only and HCM only groups within each cell type. When paired with a significant p-  
163 value ( $\leq 0.05$ ), a Moran's I statistic value near zero indicated no spatial autocorrelation and a  
164 value near 1 indicated perfect positive autocorrelation in which a gene is expressed in a focal  
165 region of the UMAP space. Results showed between 115 and 6695 genes are differentially  
166 expressed along trajectory paths among cell types and between 18 and 4518 differentially  
167 expressed genes overlapped between Normal and HCM groups among cell types (Supplemental  
168 Table 3).

169  
170 Since many genes showed differential expression over UMAP space, further conservative  
171 filtering was performed to identify genes of interest. Genes with Moran's I statistic available for  
172 a single condition, Normal or HCM, were filtered by a Moran's I statistic value above 0.1, while  
173 genes with Moran's I statistics available for both classes were filtered by an absolute difference



174 >0.1. For each cell type, 1 to 18 genes passed the filter with 64 unique genes in total passing the  
175 filter among all cell types (Supplemental Table 4). The expression of these filtered genes was  
176 then plotted in UMAP space for their associated cell type in Normal and HCM conditions as  
177 shown for a subset of identified genes in cardiomyocytes (Supplemental Figure 1). Visual  
178 analysis of the UMAP plots revealed 44 genes with pronounced differences in their spatial  
179 expression between Normal and nonobstructive HCM conditions (summary in Table 3). Of these  
180 44 genes, 3 (*MYH7*, *MYL2*, *TNNT2*) are already known to be associated with human HCM. GO  
181 Enrichment analysis of these 44 differentially expressed genes revealed significant enrichment  
182 for molecular functions involving actin binding, biological processes involving muscle  
183 development and muscle differentiation and cellular components including the sarcomere,  
184 myofibril and contractile fiber (Fig. 3A). Analysis of genes from this list showing increased  
185 expression in nonobstructive HCM revealed significant enrichment in molecular functions  
186 involving structural constituent of muscle and actin binding, no enriched biological processes  
187 and enrichment in cellular components involving the sarcomere, myofibril and contractile fiber  
188 (Fig. 3B). Analysis of genes from this list showing decreased expression in nonobstructive HCM  
189 revealed enrichment for molecular functions involving lipid transport and the ECM structural  
190 constituent, biological processes involving muscle differentiation, muscle development, lipid  
191 transport and lipid localization, and cellular components involving the endoplasmic reticulum  
192 membrane (Fig. 3C).

193

194 **Ligand-receptor pair gene expression indicates alteration of intercellular communication in**  
195 **HCM**

196 *HCM is associated with a general decrease in cell-cell communication but an increase in*  
197 *fibroblast, smooth muscle cell and pericyte to dendritic communication and an increase in*  
198 *smooth muscle cell to leukocyte communication*

199  
200 To quantify potential cardiac cell-cell communication in Normal and nonobstructive HCM IVS  
201 tissue, we quantified the number of possible expressed ligand-receptor pairs among cell types  
202 as previously described<sup>23, 24</sup>. We examined the expression of a curated list of 3627 unique  
203 human ligand-receptor (L-R) pairs derived by combining a collection of 2557 human L-R pairs<sup>25</sup>  
204 with another set of 3398 human L-R pairs<sup>26</sup> and eliminating duplicate pairs. Ligands and  
205 receptors were considered expressed if their associated gene was detectable in  $\geq 20\%$  of cells in  
206 a cell type. Notably, quantification of cell-cell communication in this study represents potential  
207 communication as we account for only expressed ligand-receptor pairs and not the position or  
208 boundaries of cell types. Results showed that nonobstructive HCM IVS tissue demonstrated a  
209 reduced intercellular communication network among our 8 identified cell types compared to  
210 normal IVS tissue (Fig. 4). Quantitatively, the total number of expressed ligand-receptor pairs in  
211 the nonobstructive HCM tissue (n=405) was much lower than in Normal tissue (n=710, Fig. 4A,  
212 B). Analysis of the broadcast ligands by individual cell types demonstrates that 1) all cells except  
213 for smooth muscle cells show a broad decrease in both paracrine and autocrine ligand  
214 broadcasting in nonobstructive HCM (Fig. 4B, C, D) and 2) fibroblasts broadcast the greatest  
215 number of ligands to the other cell types in both Normal and nonobstructive HCM tissue.  
216 Analysis of receptor expression again showed a broad decrease across cell types, except for  
217 dendritic cells (Fig. 4B, C, D). Fibroblast communication is particularly high with fibroblast,

218 endothelial, pericyte, smooth muscle, neuronal, and cardiomyocyte cells (Fig. 4). While  
219 intercellular communication was generally reduced in nonobstructive HCM tissue compared to  
220 Normal tissue, there was several cases of increased nonobstructive HCM communication, from  
221 fibroblasts, smooth muscle cells, pericytes and cardiomyocytes to dendritic cells and from  
222 smooth muscle cells to leukocytes (Fig 4C, D).  
223  
224 Communication between fibroblasts and dendritic cells increased from 5 to 13 L-R pairs in  
225 nonobstructive HCM tissue due primarily to the dendritic cells in nonobstructive HCM tissue  
226 gaining *ITGB1* receptor expression to enable communication with several cognate ligands  
227 (COL1A2, COL3A1, COL4A1, COL6A1, COL6A2, COL6A3, FN1, LAMA2, LGALS1, LUM;  
228 Supplemental Table 5). The increase in smooth muscle cell to dendritic cell communication (3  
229 to 9 L-R pairs) is also primarily due to dendritic cells in nonobstructive HCM tissue gaining *ITGB1*  
230 receptor expression, to enable communication with several smooth muscle cell cognate ligands  
231 (COL1A2, COL4A1, COL6A1, COL6A2, FN1, LGALS1; Supplemental Table 5). Similarly, increased  
232 pericyte to dendritic cell interaction (3 to 8 L-R pairs) is also due primarily to nonobstructive  
233 tissue dendritic cells gaining *ITGB1* receptor expression, to enable communication with several  
234 pericyte cognate ligands (COL1A2, COL4A1, COL6A1, COL6A2, FN1, LGALS1; Supplemental Table  
235 5). The increase in smooth muscle cell to leukocyte communication in nonobstructive HCM (6 to  
236 10 L-R pairs) is due to leukocytes gaining *ITGB1* receptor expression, to enable communication  
237 with several smooth muscle cell cognate ligands (COL1A2, COL4A1, COL6A1, COL6A2, FN1)  
238 (Supplemental Table 6).  
239

240 *Changes in ligand-receptor pair gene expression imply alterations in molecular function*

241

242 To assess the molecular functions potentially affected by changes in ligand-receptor signaling  
243 among our 8 identified cell types, GO enrichment analysis was performed on the ligands and  
244 receptors in expressed ligand-receptor pairs from both Normal and nonobstructive HCM tissue  
245 (Fig. 5). We observed a decrease in most identified ligand molecular functions (34 of 47) in the  
246 nonobstructive HCM heart tissue compared to the Normal heart tissue, with complete loss of  
247 functions involving insulin receptor binding, insulin-like growth factor receptor binding,  
248 lipoprotein particle receptor binding, and structural molecule activity conferring elasticity (note,  
249 these are low count normal MFs; Figure 5A). Large decreases in nonobstructive molecular  
250 functions relative to Normal (>100 count difference) were found for extracellular matrix  
251 structural constituent, extracellular matrix structural constituent conferring tensile strength  
252 (56%), growth factor binding (57%), peptidase regulator activity (75%), platelet-derived growth  
253 factor binding (56%), protease binding (74%; Figure 5A). Large increases in molecular functions  
254 in nonobstructive HCM tissue relative to normal tissue (>50 count difference) were noted for  
255 adenylate cyclase binding, calcium channel inhibitor activity, calcium channel regulator activity,  
256 channel inhibitor activity, protein kinase activator activity, protein N-terminus binding, protein  
257 phosphatase activator activity, protein serine threonine kinase activator activity and titin  
258 binding. When ligand molecular function is assessed in individual cell types, a general decrease  
259 in most nonobstructive molecular functions is observed compared to the normal condition  
260 (Figure 5B-I) with generally more drastic decreases in cardiomyocytes, endothelial cells,  
261 dendritic cells, leukocytes, and neuronal cell ligand molecular functions (Figure 5). Less drastic

262 decreases and increases are observed in non-obstructive ligand molecular functions among  
263 fibroblasts, pericytes, and smooth muscle cells (Figure 5).

264  
265 Molecular functions associated with changes in receptor expression align with changes in ligand  
266 expression (Fig. 6A) including the finding of a general decrease in most nonobstructive  
267 molecular functions compared to the Normal condition (46 of 65 molecular functions; Figure 6).  
268 The largest decreases (>100 count difference) in nonobstructive molecular functions compared  
269 to Normal included amyloid beta binding, coreceptor activity, lipoprotein, peptide binding, and  
270 scavenger receptor activity (Figure 6A). The largest increases (> 100 count difference) in  
271 nonobstructive molecular functions relative to Normal included amide binding, calcium  
272 molecular functions, calmodulin binding, channel/gated channel molecular functions, divalent  
273 inorganic cation transmembrane transporter activity, metal ion transmembrane transporter  
274 activity, protein kinase A activity, and sulfur compound binding (Figure 6A). Trends in receptor  
275 molecular functions in individual cell types are notable for increases related to signal  
276 transduction in dendritic cells and leukocytes, particularly calcium channel activity and protein  
277 kinase A activity in dendritic cells.

278  
279 *Fibroblast subtypes show subtype-specific changes in cell-cell communication*

280  
281 To better understand the interaction between the different fibroblast populations and other  
282 cell types in the IVS, we examined the potential ligand-receptor communication through cell  
283 network plots for all fibroblast subtypes alongside the other previously identified 7 cell types

284 (Fig. 7A, C, D). In Normal tissue, all fibroblast subtypes broadcast ligands extensively to  
285 generate a dense intercellular network. In nonobstructive HCM tissue, the intercellular  
286 communication network for fibroblast subtypes shows a reduced number of broadcasting  
287 ligands compared to Normal tissue, (1502 versus 2636 respectively; Fig. 7A, B). Fibroblast  
288 cluster 2 generated the highest number of broadcasting ligands in both conditions. The largest  
289 decreases in potential interactions occurred between fibroblast cluster 2 and fibroblast clusters  
290 2 through 6 (Supplemental Table 7) and between fibroblast cluster 5 and fibroblast clusters 2  
291 through 6 (Supplemental Table 8). In fibroblast cluster 2 from nonobstructive HCM tissue, there  
292 was a disproportionate reduction in expression of cognate ligands for the ITGB1 receptor  
293 (COL18A1, COL5A1, COL5A2, FBLN1, FBN1, HSPG2, LAMC1, LGALS3BP, NID1, THBS2) and also of  
294 ligands for the LRP1 receptor (APP, C3, CALR, CTGF, HSPG2, LRPAP1, SERPINE2, SPERPING1,  
295 TFPI). *ITGB1* and *LRP1* were expressed in both normal and nonobstructive HCM fibroblasts from  
296 cluster 2. Interaction between fibroblast cluster 2 and fibroblast clusters 3-5 was reduced in  
297 nonobstructive HCM primarily due to loss of the LRP1 receptor and several cognate ligands for  
298 the ITGB1 receptor (COL18A1, COL5A1, COL5A2, FBLN1, FBN1, HSPG2, LAMC1, LGALS3BP, NID1,  
299 THBS2). *ITGB1* was expressed in fibroblast clusters 3-5 in both normal and nonobstructive HCM  
300 tissue.

301

302 *Cardiomyocyte subtypes show subtype-specific changes in cell-cell communication*

303

304 To better understand the interaction between the different cardiomyocyte populations and  
305 other cell types in the IVS, we performed L-R analysis for all ten cardiomyocyte subtypes and

306 the other 7 cell types (Fig. 8). In nonobstructive HCM tissue, there is again a general decrease in  
307 intercellular communication (2634 L-R pairs in normal, reduced to 2026 in nonobstructive HCM;  
308 Fig. 8A, B), but the degree of reduction is lower than seen when subtypes are not considered or  
309 when fibroblast subtypes are considered. The largest decreases occur in ligands broadcast from  
310 endothelial cells and in receptors expressed by fibroblasts and the cardiomyocyte 4 cluster.  
311 Notably, there are increases in ligands broadcast by cardiomyocyte clusters 1, 2, 5, 9 and by  
312 smooth muscle cells and in receptors in cardiomyocyte clusters 1, 3 and 9 and dendritic cells in  
313 nonobstructive HCM (Fig. 8B). The greatest reductions in intercellular L-R connections involve  
314 fibroblasts broadcasting to fibroblasts and cardiomyocyte cluster 4 (Supplemental Table 9), and  
315 from endothelial cells broadcasting to fibroblasts, cardiomyocyte cluster 4 and cardiomyocyte  
316 cluster 8 (Supplemental Table 10). In both cases, reduction in intercellular communication is  
317 due to loss of LRP1 receptor expression in fibroblasts as well as loss of ligands for ITGB1  
318 (COL11A1, FBLN1, FBN1, HSPG2, LAMB1, LAMC1, NID1, VCAN) in fibroblasts and endothelial  
319 cells. Notably, *ITGB1* is expressed in fibroblasts and cardiomyocyte clusters 4 and 8 in both  
320 Normal tissue and nonobstructive HCM tissue. Increases in communication from cardiomyocyte  
321 clusters 2, 5, fibroblasts and smooth muscle cells to cardiomyocyte cluster 9 is due to gain of  
322 expression of *ITGB1* in cardiomyocyte cluster 9 (Supplemental Table 11). Increased  
323 communication from cardiomyocyte cluster 5 to dendritic cells is also due to gain of expression  
324 of *ITGB1* in dendritic cells (Supplemental Table 12).

325

326 *Cardiomyocyte subtypes and fibroblast subtypes together show cell subtype-specific alterations*  
327 *in cell-cell communication*

328  
329 Given that cardiomyocytes and fibroblasts are the most numerous cells in the heart and  
330 demonstrate the most subtypes in our study, we examined the intercellular networks between  
331 cardiomyocyte subtypes and fibroblast subtypes in normal tissue and nonobstructive HCM. The  
332 total number of expressed ligand-receptor pairs in the Normal tissue was greater than in the  
333 nonobstructive HCM tissue (3354 and 2399 expressed ligand-receptor pairs respectively, Fig. 9).  
334 The largest decreases in cellular communication involved fibroblast cluster 5, through reduction  
335 in both broadcasted ligands and expressed receptors. The largest reductions in L-R pairs  
336 occurred between fibroblast clusters 2 or 5 and fibroblast clusters 2-6 (Supplemental Table 13)  
337 and resulted from loss of ligands for ITGB1, which was still expressed in the recipient cells in  
338 both normal and nonobstructive HCM, or from loss of the LRP1 receptor in recipient fibroblast  
339 clusters except for fibroblast cluster 2. The largest increases in communication due to ligand  
340 broadcasting involved cardiomyocyte clusters 2, 5 and 9 and increases due to receptor  
341 expression involved cardiomyocyte clusters 1, 3, 9 and fibroblast cluster 1 (Fig. 9B). Increased  
342 communication to cardiomyocyte cluster 9 from fibroblast clusters 1-5 and cardiomyocyte  
343 clusters 2, 3 and 5 were due to gain of ITGB1 expression in cardiomyocyte cluster 9  
344 (Supplemental Table 14).

345

## 346 **Discussion**

347

348 HCM has long been considered a disease of the sarcomere based on the association of  
349 sarcomere gene mutations with HCM, but the contributions from other loci are increasingly



350 appreciated<sup>2,3</sup>, as are potential mechanisms aside from sarcomere dysfunction<sup>27</sup>. We have  
351 previously examined single nuclei gene expression patterns in obstructive HCM. In this prior  
352 study, we did not identify any HCM-specific cell populations but observed a profound reduction  
353 in intercellular communication, especially in pathways mediated by ITGB1, and altered  
354 extracellular matrix gene expression, which may explain some of the nonmyocyte phenotypes  
355 seen in HCM such as fibrosis and link these phenotypes to alterations in mechanical signal  
356 transduction<sup>16</sup>. In the current study, we performed a single nucleus transcriptome analysis of  
357 tissue from patients with nonobstructive HCM, using tissue from the IVS harvested at the time  
358 of cardiac transplantation. This patient population is distinct from those with obstructive HCM  
359 in that they do not have LVOT obstruction and generally have more severe, intractable heart  
360 failure that results in cardiac transplantation. Determining gene expression patterns at the  
361 single cell level in nonobstructive HCM thus has the potential for facilitating precision medicine  
362 approaches for this specific population, through overlapping and unique pathogenic  
363 mechanisms relative to obstructive HCM.

364  
365 The single nuclei gene expression patterns for nonobstructive HCM parallel those for  
366 obstructive HCM in that there are no disease-specific cell clusters and there is a reduction in  
367 intercellular communication, particularly in pathways involving ITGB1 and its associated ECM  
368 ligands. As with obstructive HCM, changes in gene expression involve sarcomere genes known  
369 to be associated with HCM and GO analysis indicates that gene expression changes are relevant  
370 to the extracellular matrix and sarcomere function, indicating that these are common,  
371 fundamental disease processes in HCM, regardless of LVOT obstruction. We have previously

372 noted that a reduction in ECM associated gene expression and molecular function in  
373 obstructive HCM is counterintuitive based on the association between HCM and increased  
374 fibrosis and have suggested that the reduction in gene expression may represent a negative  
375 feedback loop that follows the accumulation of ECM protein in tissue <sup>16</sup>. Concordant findings in  
376 nonobstructive HCM can be explained similarly. Precision medicine approaches that target  
377 integrin signaling and ECM interaction may one day prove useful for both obstructive and  
378 nonobstructive HCM.

379  
380 A notable difference between obstructive and nonobstructive HCM in our current study,  
381 however, involves the unexpected increases in communication between fibroblasts, smooth  
382 muscle cells and pericytes with dendritic cells and between smooth muscle cells and leukocytes  
383 in the nonobstructive HCM condition relative to the control condition. Immune cells have been  
384 demonstrated to play important roles in development of cardiac hypertrophy and fibrosis in a  
385 pressure overload model of rodent hypertrophy (reviewed in <sup>28</sup>). Dendritic cells function as  
386 antigen presenting cells that activate T cell responses and depletion of these cells reduces  
387 cardiomyocyte hypertrophy, cardiac fibrosis, LV remodeling and inflammatory cell infiltration  
388 after pressure overload <sup>29</sup>. A role for dendritic cells in human heart failure is less well-  
389 established, although a trend toward elevated numbers in blood has been reported <sup>30</sup>. Integrin-  
390 mediated signaling has been shown to be an important determinant of dendritic cell function,  
391 with ITGB1 determining dendritic morphology <sup>31</sup> and promoting an anti-inflammatory  
392 phenotype in bone-marrow-derived dendritic cells <sup>32</sup>. Our data linking dendritic cells to  
393 fibroblasts, smooth muscle cells and pericytes by ITGB1 signaling is novel and suggests an

394 important role for these cells in the pathological hypertrophy, cardiac fibrosis and vascular  
395 abnormalities seen in nonobstructive HCM. Our additional novel observation that signal  
396 transduction related molecular functions such as calcium channel activity and protein kinase A  
397 activity are increased in dendritic cells from nonobstructive HCM hearts also provides additional  
398 potential pathways for precision-medicine guided therapy for nonobstructive HCM.

399  
400 We have previously noted extensive cardiomyocyte and fibroblast diversity in the human IVS,  
401 likely due to the diverse origins of the cells within this anatomic region<sup>15,16</sup>. We have also  
402 noted that the different cardiomyocyte and fibroblast subtypes exhibit specific intercellular  
403 communication profiles<sup>16,24</sup> and the phenomenon is observed again in this study. Specific  
404 cardiomyocyte and fibroblast subtypes appear to adopt distinct functional roles relevant to the  
405 disease process by shifting patterns of gene expression to increase or decrease interactions of  
406 cell types. An ongoing challenge is to determine which of these shifts is most relevant to the  
407 disease process and thus identify potential therapeutic targets. Future spatial transcriptomic  
408 experiments assigning single cell populations to anatomic pathological features of HCM, such as  
409 areas of myocyte disarray, fibrosis, focal myocyte hypertrophy, and vascular abnormalities will  
410 likely be informative. Our study is the first to characterize transcription patterns in  
411 nonobstructive HCM at single cell resolution and provides an important resource for future  
412 investigation of the complex cellular interplay in nonobstructive HCM.

413

414

415 **Methods**

416

417 *Study Patients, Sample Collection and Processing*

418

419 A total of 6 patients with end stage, nonobstructive HCM scheduled for cardiac transplantation  
420 were approached for written informed consent to allow their tissue to be used for research.

421 Those who consented underwent surgery and tissue was collected. Explanted heart tissue

422 sample processing was done as previously described<sup>15,16</sup>. 100 mg of collected interventricular

423 septum tissue was minced into 1 mm<sup>3</sup> pieces, placed in 0.5 mL of CryoStor CS10 Freeze Media

424 (STEMCELL Technologies), and stored in a MrFrosty (ThermoFisher) at 4°C for 10 minutes and

425 then transferred to -80°C overnight. Bulk RNA was isolated from a piece of tissue using the

426 Qiagen RNeasy Plus Micro kit and then assessed on the Agilent Bioanalyzer 2100. Samples with

427 an RNA Integrity Number greater than 8.5 were used in library preparation. Sample collection

428 was approved by the Tufts University/Medical Center Health Sciences Institutional Review

429 Board under IRB protocol # 9487. Patient characteristics were obtained from the medical

430 record and are shown in Table 1. Tissue from organ donor patients without underlying cardiac

431 disease was obtained and processed as described previously<sup>15</sup>.

432

433 *Nuclei isolation, library preparation, and sequencing*

434

435 Generation of single nuclei sequencing libraries was performed as previously described<sup>15,16</sup>.

436 Cryopreserved samples were thawed at 37°C and placed on ice. Nuclei were isolated via

437 Dounce homogenization as previously described<sup>33</sup>. Homogenates were filtered through a

438 Pluristrainer 10  $\mu$ M cell strainer (Fisher Scientific) into a pre-chilled tube. Nuclei were pelleted  
439 by centrifuging at 500 x g for 5 min at 4°C. Nuclei pellets were washed and pelleted according to  
440 manufacturer protocol (10x Genomics). Nuclei were stained with trypan blue and counted on a  
441 hemocytometer to determine concentration prior to loading of the 10x Chromium device and  
442 samples were diluted to capture ~10,000 nuclei. Nuclei were separated into Gel Bead Emulsion  
443 droplets using the 10x Chromium device according to the manufacturer protocol (10x  
444 Genomics). Sequencing libraries were prepared using the Chromium Single Cell 3' reagent V2  
445 kit according to manufacturer's protocol. Libraries were multiplexed and sequenced on a  
446 NovaSeq S4 (Illumina) to produce ~50,000 reads per nucleus. Single nuclei RNAseq data for  
447 normal IVS tissue from 4 donors is available in the Gene Expression Omnibus database under  
448 accession number GSE161921<sup>15</sup>. Data for nonobstructive HCM IVS tissue and additional normal  
449 heart donors is available under accession number GSE181764.

450

#### 451 *Clustering of Cells by Gene Expression Pattern and Assignment of Cell Type Identity*

452

453 Clustering of cells and assignment of cell identity was done as previously described<sup>15, 16</sup>.  
454 Sequencing reads were processed using Cell Ranger version 6.0.1<sup>17</sup>. The gene expression matrix  
455 was subset to only include reads from the nuclear genome. Quality control (QC) filtering,  
456 clustering, dimensionality reduction, visualization, and differential gene expression were  
457 performed using the R package Seurat version 3.0. Each dataset was filtered so that genes that  
458 were expressed in three nuclei or more were included in the final dataset. The dataset was  
459 further subset to exclude nuclei that had fewer than 200 genes expressed to remove droplets

460 containing only ambient RNA, and to exclude nuclei with greater than 2000 genes to remove  
461 droplets that contained two nuclei. Datasets were individually normalized and integrated using  
462 Seurat's SCTransform development workflow to reduce batch effects<sup>18</sup>. Optimal clustering  
463 resolution was determined using Clustree version 0.4.3<sup>34</sup> to identify the resolution where the  
464 number of clusters stays stable and was determined to be 0.9 for the integrated dataset.  
465 Assignment of cell identity to each cluster was performed using four separate analyses.  
466 Expression of known cell-specific gene markers were used to identify major cell types, as done  
467 previously<sup>13, 15, 24, 35</sup>. The top 20-30 differentially expressed genes in each cluster were also  
468 compared with cell type gene expression markers from the PanglaoDB database  
469 <https://panglaodb.se><sup>19</sup> to independently assign cell type. Entire sets of differentially expressed  
470 genes for each cluster were also subjected to Ingenuity Pathway Analysis<sup>21</sup> and their inferred  
471 functions were used to identify cluster cell types independently. Upregulated genes from each  
472 cluster were also subject to Gene Ontology biological process association using GoStats<sup>20</sup> and  
473 these associations were used to refine cell type assignment further.

474

#### 475 *Trajectory Analysis and Identification of Differentially Expressed Genes*

476

477 Trajectory analysis was performed using Monocle3<sup>22</sup> to determine the relationship between  
478 subtypes of cells identified in our clustering analysis as previously described<sup>16</sup>. Since our data  
479 do not represent a developmental time course, we determined the root nodes for each subtype  
480 by hierarchical clustering prior to generating trajectories and assigning pseudotime to each cell.  
481 Each cell type was analyzed in three cohorts: 1. Normal and nonobstructive HCM cells together;

482 2. Normal cells alone; 3. Nonobstructive HCM cells alone. Once trajectories were established,  
483 differential expression between Normal and HCM cells by cell type and cluster was performed  
484 by fitting a generalized linear regression model to each gene according to the formula  $\log(y_i) =$   
485  $\beta_0 + \beta_{\text{txt}}$ . The coefficients  $\beta_0$  and  $\beta_{\text{txt}}$  were extracted from each model and tested for significant  
486 difference from zero using the Wald test, which assesses constraints on statistical parameters  
487 based on the weighted distance between the unrestricted estimate and its hypothesized value  
488 under the null hypothesis, where the weight is the precision of the estimate. A gene was  
489 determined to be differentially expressed between Normal and HCM conditions in a cell type or  
490 cluster if the Wald test produced an adjusted p-value  $\leq 0.05$ .

491  
492 Differentially expressed genes over trajectory paths in UMAP space (i.e., spatial  
493 autocorrelation) was performed in Monocle3 using Moran's I statistic. Moran's I statistic is a  
494 value that varies from -1 to 1, where -1 indicates perfect dispersion, 0 indicates no spatial  
495 autocorrelation, and 1 indicates perfect positive autocorrelation (i.e., nearby cells in have  
496 similar gene expression values in focal region of UMAP space). For each Normal and  
497 nonobstructive HCM cell type, a gene was determined to be differentially expressed over space  
498 if the associated Moran's I statistic value was positive, paired with a significant adjusted p-value  
499  $\leq 0.05$ , and expressed in  $\geq 1\%$  of associated cells. Since many genes showed differential  
500 expression over space, further conservative filtering was performed in which genes with  
501 Moran's I statistic available in a single class (i.e., Normal or HCM) were filtered by Moran's I  
502 statistic values  $> 0.1$ . For genes with Moran's I statistics available in both classes (i.e., Normal  
503 and HCM), genes were filtered by an absolute difference  $> 0.1$ . GO analysis of molecular

504 function and biological process associated with differentially expressed genes was done using  
505 the online tools at [uniprot.org/uniprotkb](http://uniprot.org/uniprotkb) <sup>36</sup>.

506

507 *Analysis of Ligand-Receptor Pair Gene Expression to Discover Intercellular Communication*  
508 *Pathways*

509

510 To quantify potential cardiac cell-cell communication in Normal and HCM hearts, cell  
511 communication networks were plotted in igraph version 1.2.6 <sup>37</sup> and compared on the basis of  
512 ligand-receptor pair gene expression. Our cell-cell communication networks were derived as  
513 described previously <sup>23</sup>, using a list of 2557 human ligand-receptor pairs <sup>25</sup> combined with  
514 another list of 3398 human ligand-receptor pairs <sup>26</sup>, to give a total of 3627 unique human  
515 ligand-receptor pairs, largely as described previously <sup>16</sup>. A ligand or receptor for each cell type  
516 or cluster was considered expressed if the corresponding gene showed an above zero gene  
517 count in  $\geq 20\%$  of cells in our snRNAseq data. We initially analyzed the potential signaling  
518 interactions between the 8 cell types identified in our snRNAseq data. Lines in our cell networks  
519 connect two cell types and represent expressed human ligand-receptor pairs (i.e., potential cell-  
520 cell communication between a broadcasting (ligand) and recipient (receptor) cell types. Line  
521 color in our networks represents the broadcasting ligand source. Line thickness is proportional  
522 to the number of uniquely expressed ligand-receptor pairs. Cell-cell communication networks  
523 were also analyzed by fibroblast cluster along with other cell types, by cardiomyocyte cluster  
524 and other cell types and by fibroblast clusters and cardiomyocyte clusters. GO analysis of



525 differentially expressed ligand receptor pairs was performed using the R package clusterProfiler  
526 <sup>38</sup>.

527

### 528 *Statistics*

529 We used mixed effects models to analyze cell type specific differential expression, while taking  
530 into account the variability between and within subjects. A sample size of 6 cases and 6  
531 controls, with an average of 3,000 cells per subject, will provide 80% power to detect fold  
532 change of expression ranging between 1.3 for an intracluster correlation of 0.01, and 2 for an  
533 intracluster correlation of 0.1. The power calculations were pretty stable for sample sizes  
534 ranging between 500 and 3000 cells per subject. We used a Bonferroni correction for 10,000  
535 tests to fix the level of significance. The power calculations were conducted using Power  
536 Analysis and Sample Size software (PASS).

537

538 Other statistical methods to cluster cells in UMAP space and control for batch effects using the  
539 built-in functionality of Seurat <sup>18</sup>, to determine cluster stability by Clustree <sup>34</sup> and to perform  
540 Gene Ontology Analysis using well documented software programs <sup>38</sup> are described in above  
541 methods sections and in cited references. Statistical methods to compare gene expression  
542 along pseudotime trajectories using linear regression or spatial autocorrelation using the built-  
543 in functionality of Monocle3 are described above and in the original cited reference <sup>22</sup>.

544

### 545 *Study Approval*

546 Explanted HCM heart sample collection was approved by the Tufts University/Medical Center  
547 Health Sciences Institutional Review Board under IRB protocol # 9487. All subjects gave their  
548 informed consent for inclusion before they participated in the study. The study was conducted  
549 in accordance with the Declaration of Helsinki. Unused donor hearts were obtained in  
550 deidentified fashion from New England Donor Services under a Tufts University/Medical Center  
551 Health Sciences IRB approved research protocol after being designated as not human subjects  
552 research.  
553

554 **Author contributions:**

555 Conceptualization: MTC

556 Data Curation: CJC, AL, GP, MTC

557 Formal Analysis: CJC, MTC

558 Methodology: CJC, AL, JA, GP, MTC

559 Investigation: AL, CJC, JA, GP, MTC

560 Visualization: CJC, AL, MTC

561 Funding acquisition: MTC, AL

562 Project administration: MTC

563 Resources: AL, MTC

564 Software: AL, CJC

565 Supervision: MTC

566 Writing – original draft: MTC

567 Writing – review & editing: AL, CJC, JA, GP, MTC

568

569 **Acknowledgements**

570 We thank Paola Sebastiani for helpful discussions regarding statistics.

571

572 **Funding:**

573 American Heart Association Innovative Project Award 18IPA34170294 (MTC)

574

575 National Center for Advancing Translational Sciences, National Institutes of Health, Award

576 Number UL1TR002544 (MTC)

577

578 National Heart, Lung, and Blood Institute of the National Institutes of Health, Award Number

579 F32HL147492 (AL)

580

581 Beals Goodfellow Award for CardioVascular Research at Tufts Medical Center (AL)

582

583

584

585

586 **References**

587

- 588 1. Thierfelder L, Watkins H, MacRae C, Lamas R, McKenna W, Vosberg HP, Seidman JG and  
589 Seidman CE. Alpha-tropomyosin and cardiac troponin T mutations cause familial hypertrophic  
590 cardiomyopathy: a disease of the sarcomere. *Cell*. 1994;77:701-12.
- 591 2. Harper AR, Goel A, Grace C, Thomson KL, Petersen SE, Xu X, Waring A, Ormondroyd E,  
592 Kramer CM, Ho CY, Neubauer S, Investigators H, Tadros R, Ware JS, Bezzina CR, Farrall M and  
593 Watkins H. Common genetic variants and modifiable risk factors underpin hypertrophic  
594 cardiomyopathy susceptibility and expressivity. *Nat Genet*. 2021;53:135-142.
- 595 3. Tadros R, Francis C, Xu X, Vermeer AMC, Harper AR, Huurman R, Kelu Bisabu K, Walsh R,  
596 Hoorntje ET, Te Rijdt WP, Buchan RJ, van Velzen HG, van Slegtenhorst MA, Vermeulen JM,  
597 Offerhaus JA, Bai W, de Marvao A, Lahrouchi N, Beekman L, Karper JC, Veldink JH, Kayvanpour  
598 E, Pantazis A, Baksi AJ, Whiffin N, Mazarotto F, Sloane G, Suzuki H, Schneider-Luftman D, Elliott  
599 P, Richard P, Ader F, Villard E, Lichtner P, Meitinger T, Tanck MWT, van Tintelen JP, Thain A,  
600 McCarty D, Hegele RA, Roberts JD, Amyot J, Dube MP, Cadrin-Tourigny J, Giraldeau G, L'Allier  
601 PL, Garceau P, Tardif JC, Boekholdt SM, Lumbers RT, Asselbergs FW, Barton PJR, Cook SA,  
602 Prasad SK, O'Regan DP, van der Velden J, Verweij KJH, Talajic M, Lettre G, Pinto YM, Meder B,  
603 Charron P, de Boer RA, Christiaans I, Michels M, Wilde AAM, Watkins H, Matthews PM, Ware JS  
604 and Bezzina CR. Shared genetic pathways contribute to risk of hypertrophic and dilated  
605 cardiomyopathies with opposite directions of effect. *Nat Genet*. 2021;53:128-134.
- 606 4. Watkins H. Time to Think Differently About Sarcomere-Negative Hypertrophic  
607 Cardiomyopathy. *Circulation*. 2021;143:2415-2417.
- 608 5. Ho CY, Day SM, Ashley EA, Michels M, Pereira AC, Jacoby D, Cirino AL, Fox JC, Lakdawala  
609 NK, Ware JS, Caleshu CA, Helms AS, Colan SD, Girolami F, Cecchi F, Seidman CE, Sajeev G,  
610 Signorovitch J, Green EM and Olivotto I. Genotype and Lifetime Burden of Disease in  
611 Hypertrophic Cardiomyopathy: Insights from the Sarcomeric Human Cardiomyopathy Registry  
612 (SHaRe). *Circulation*. 2018;138:1387-1398.
- 613 6. Kong P, Christia P and Frangogiannis NG. The pathogenesis of cardiac fibrosis. *Cell Mol*  
614 *Life Sci*. 2014;71:549-74.
- 615 7. Ma ZG, Yuan YP, Wu HM, Zhang X and Tang QZ. Cardiac fibrosis: new insights into the  
616 pathogenesis. *Int J Biol Sci*. 2018;14:1645-1657.
- 617 8. Nagaraju CK, Dries E, Gilbert G, Abdesselem M, Wang N, Amoni M, Driesen RB and  
618 Sipido KR. Myofibroblast modulation of cardiac myocyte structure and function. *Sci Rep*.  
619 2019;9:8879.
- 620 9. O'Hanlon R, Grasso A, Roughton M, Moon JC, Clark S, Wage R, Webb J, Kulkarni M,  
621 Dawson D, Sulaiibek L, Chandrasekaran B, Bucciarelli-Ducci C, Pasquale F, Cowie MR,  
622 McKenna WJ, Sheppard MN, Elliott PM, Pennell DJ and Prasad SK. Prognostic significance of  
623 myocardial fibrosis in hypertrophic cardiomyopathy. *J Am Coll Cardiol*. 2010;56:867-74.
- 624 10. Bruder O, Wagner A, Jensen CJ, Schneider S, Ong P, Kispert EM, Nassenstein K, Schlosser  
625 T, Sabin GV, Sechtem U and Mahrholdt H. Myocardial scar visualized by cardiovascular  
626 magnetic resonance imaging predicts major adverse events in patients with hypertrophic  
627 cardiomyopathy. *J Am Coll Cardiol*. 2010;56:875-87.

- 628 11. Ellims AH, Iles LM, Ling LH, Hare JL, Kaye DM and Taylor AJ. Diffuse myocardial fibrosis in  
629 hypertrophic cardiomyopathy can be identified by cardiovascular magnetic resonance, and is  
630 associated with left ventricular diastolic dysfunction. *J Cardiovasc Magn Reson*. 2012;14:76.
- 631 12. Maron BJ and Longo DL. Clinical Course and Management of Hypertrophic  
632 Cardiomyopathy. *New England Journal of Medicine*. 2018;379:655-668.
- 633 13. Tucker NR, Chaffin M, Fleming SJ, Hall AW, Parsons VA, Bedi KC, Jr., Akkad AD, Herndon  
634 CN, Arduini A, Papangeli I, Roselli C, Aguet F, Choi SH, Ardlie KG, Babadi M, Margulies KB,  
635 Stegmann CM and Ellinor PT. Transcriptional and Cellular Diversity of the Human Heart.  
636 *Circulation*. 2020;142:466-482.
- 637 14. Litvinukova M, Talavera-Lopez C, Maatz H, Reichart D, Worth CL, Lindberg EL, Kanda M,  
638 Polanski K, Heinig M, Lee M, Nadelmann ER, Roberts K, Tuck L, Fasouli ES, DeLaughter DM,  
639 McDonough B, Wakimoto H, Gorham JM, Samari S, Mahbubani KT, Saeb-Parsy K, Patone G,  
640 Boyle JJ, Zhang H, Zhang H, Viveiros A, Oudit GY, Bayraktar O, Seidman JG, Seidman CE, Nosedá  
641 M, Hubner N and Teichmann SA. Cells of the adult human heart. *Nature*. 2020;588:466-472.
- 642 15. Larson A and Chin MT. A method for cryopreservation and single nucleus RNA-  
643 sequencing of normal adult human interventricular septum heart tissue reveals cellular  
644 diversity and function. *BMC Med Genomics*. 2021;14:161.
- 645 16. Larson A, Codden CJ, Huggins GS, Rastegar H, Chen FY, Maron BJ, Rowin EJ, Maron MS  
646 and Chin MT. Altered Intercellular Communication and Extracellular Matrix Signaling as a  
647 Potential Disease Mechanism in Human Hypertrophic Cardiomyopathy. *medRxiv*.  
648 2021:2021.12.18.21268004.
- 649 17. Zheng GX, Terry JM, Belgrader P, Ryvkin P, Bent ZW, Wilson R, Ziraldo SB, Wheeler TD,  
650 McDermott GP, Zhu J, Gregory MT, Shuga J, Montesclaros L, Underwood JG, Masquelier DA,  
651 Nishimura SY, Schnall-Levin M, Wyatt PW, Hindson CM, Bharadwaj R, Wong A, Ness KD, Beppu  
652 LW, Deeg HJ, McFarland C, Loeb KR, Valente WJ, Ericson NG, Stevens EA, Radich JP, Mikkelsen  
653 TS, Hindson BJ and Bielas JH. Massively parallel digital transcriptional profiling of single cells.  
654 *Nat Commun*. 2017;8:14049.
- 655 18. Butler A, Hoffman P, Smibert P, Papalexis E and Satija R. Integrating single-cell  
656 transcriptomic data across different conditions, technologies, and species. *Nat Biotechnol*.  
657 2018;36:411-420.
- 658 19. Franzen O, Gan LM and Bjorkegren JLM. PanglaoDB: a web server for exploration of  
659 mouse and human single-cell RNA sequencing data. *Database (Oxford)*. 2019;2019.
- 660 20. Falcon S and Gentleman R. Using GOstats to test gene lists for GO term association.  
661 *Bioinformatics*. 2007;23:257-8.
- 662 21. Kramer A, Green J, Pollard J, Jr. and Tugendreich S. Causal analysis approaches in  
663 Ingenuity Pathway Analysis. *Bioinformatics*. 2014;30:523-30.
- 664 22. Cao J, Spielmann M, Qiu X, Huang X, Ibrahim DM, Hill AJ, Zhang F, Mundlos S,  
665 Christiansen L, Steemers FJ, Trapnell C and Shendure J. The single-cell transcriptional landscape  
666 of mammalian organogenesis. *Nature*. 2019;566:496-502.
- 667 23. Skelly DA, Squiers GT, McLellan MA, Bolisetty MT, Robson P, Rosenthal NA and Pinto AR.  
668 Single-Cell Transcriptional Profiling Reveals Cellular Diversity and Intercommunication in the  
669 Mouse Heart. *Cell Rep*. 2018;22:600-610.
- 670 24. Larson A, Codden CJ, Huggins GS, Rastegar H, Chen FY, Maron BJ, Rowin EJ, Maron MS  
671 and Chin MT. Altered Intercellular Communication And Extracellular Matrix Signaling As A

- 672 Disease Mechanism In Human Hypertrophic Cardiomyopathy. *Preprint (version 1) available at*  
673 [https://paperssrncom/sol3/paperscfm?abstract\\_id=3965237](https://paperssrncom/sol3/paperscfm?abstract_id=3965237). 2021.
- 674 25. Ramilowski JA, Goldberg T, Harshbarger J, Kloppmann E, Lizio M, Satagopam VP, Itoh M,  
675 Kawaji H, Carninci P, Rost B and Forrest AR. A draft network of ligand-receptor-mediated  
676 multicellular signalling in human. *Nat Commun*. 2015;6:7866.
- 677 26. Shao X, Liao J, Li C, Lu X, Cheng J and Fan X. CellTalkDB: a manually curated database of  
678 ligand-receptor interactions in humans and mice. *Brief Bioinform*. 2020.
- 679 27. Chou C and Chin MT. Pathogenic Mechanisms of Hypertrophic Cardiomyopathy beyond  
680 Sarcomere Dysfunction. *Int J Mol Sci*. 2021;22:8933.
- 681 28. Liu X, Shi GP and Guo J. Innate Immune Cells in Pressure Overload-Induced Cardiac  
682 Hypertrophy and Remodeling. *Front Cell Dev Biol*. 2021;9:659666.
- 683 29. Wang H, Kwak D, Fassett J, Liu X, Yao W, Weng X, Xu X, Xu Y, Bache RJ, Mueller DL and  
684 Chen Y. Role of bone marrow-derived CD11c(+) dendritic cells in systolic overload-induced left  
685 ventricular inflammation, fibrosis and hypertrophy. *Basic Res Cardiol*. 2017;112:25.
- 686 30. Athanassopoulos P, Balk AH, Vaessen LM, Caliskan K, Takkenberg JJ, Weimar W and  
687 Bogers AJ. Blood dendritic cell levels and phenotypic characteristics in relation to etiology of  
688 end-stage heart failure: implications for dilated cardiomyopathy. *Int J Cardiol*. 2009;131:246-56.
- 689 31. Swetman Andersen CA, Handley M, Pollara G, Ridley AJ, Katz DR and Chain BM. beta1-  
690 Integrins determine the dendritic morphology which enhances DC-SIGN-mediated particle  
691 capture by dendritic cells. *Int Immunol*. 2006;18:1295-303.
- 692 32. Yokota-Nakatsuma A, Ohoka Y, Takeuchi H, Song SY and Iwata M. Beta 1-integrin  
693 ligation and TLR ligation enhance GM-CSF-induced ALDH1A2 expression in dendritic cells, but  
694 differentially regulate their anti-inflammatory properties. *Sci Rep*. 2016;6:37914.
- 695 33. Krishnaswami SR, Grindberg RV, Novotny M, Venepally P, Lacar B, Bhutani K, Linker SB,  
696 Pham S, Erwin JA, Miller JA, Hodge R, McCarthy JK, Kelder M, McCorrison J, Aebermann BD,  
697 Fuertes FD, Scheuermann RH, Lee J, Lein ES, Schork N, McConnell MJ, Gage FH and Lasken RS.  
698 Using single nuclei for RNA-seq to capture the transcriptome of postmortem neurons. *Nat*  
699 *Protoc*. 2016;11:499-524.
- 700 34. Zappia L and Oshlack A. Clustering trees: a visualization for evaluating clusterings at  
701 multiple resolutions. *Gigascience*. 2018;7.
- 702 35. McLellan MA, Skelly DA, Dona MSI, Squiers GT, Farrugia GE, Gaynor TL, Cohen CD,  
703 Pandey R, Diep H, Vinh A, Rosenthal NA and Pinto AR. High-Resolution Transcriptomic Profiling  
704 of the Heart During Chronic Stress Reveals Cellular Drivers of Cardiac Fibrosis and Hypertrophy.  
705 *Circulation*. 2020;142:1448-1463.
- 706 36. UniProt C. UniProt: the universal protein knowledgebase in 2021. *Nucleic Acids Res*.  
707 2021;49:D480-D489.
- 708 37. Csardi G and Nepusz T. The igraph software package for complex network research.  
709 *InterJournal*. 2006;Complex Systems:1695.
- 710 38. Yu G, Wang LG, Han Y and He QY. clusterProfiler: an R package for comparing biological  
711 themes among gene clusters. *OMICS*. 2012;16:284-7.

712  
713

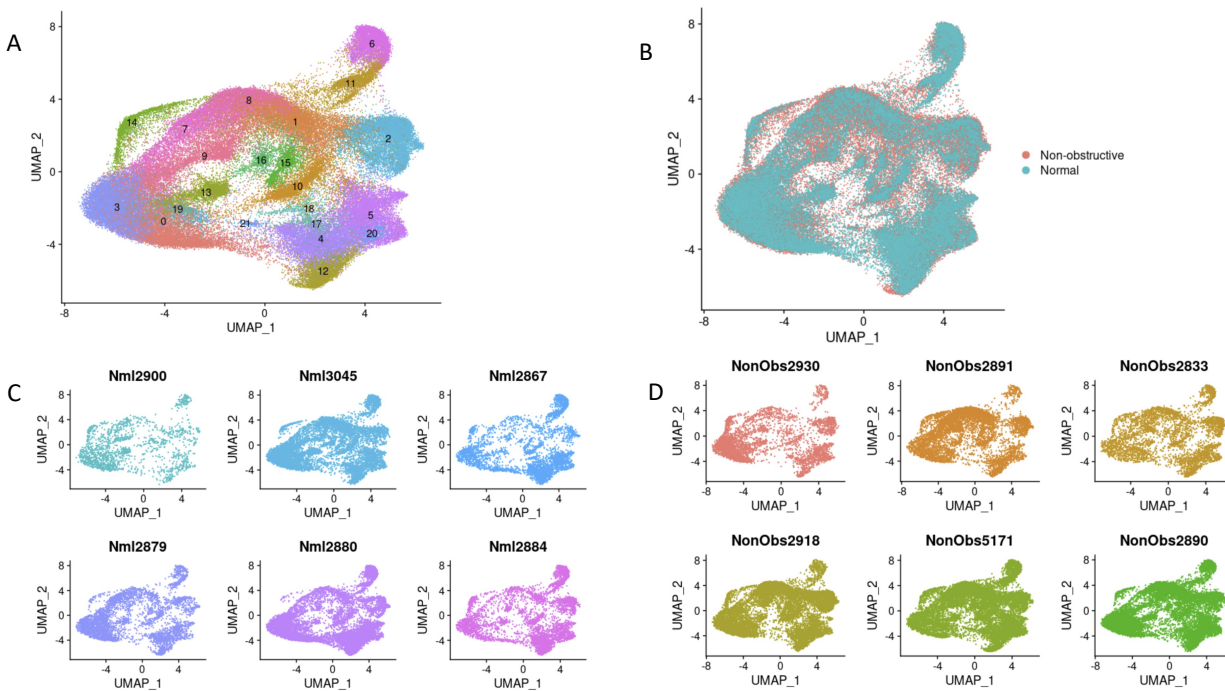

714

715

716 **Fig. 1. Single nuclei RNA-seq of Normal and HCM IVS Tissue Reveals Cellular Diversity but No**  
717 **HCM-associated Cell Types.** **A.** UMAP plot of 22 distinct cell clusters identified in the combined  
718 Normal and nonobstructive HCM dataset. **B.** Separating the cell clusters by condition does not  
719 identify HCM-specific cell types. **C.** Cluster distribution in each Normal sample. **D.** Cluster  
720 distribution in each nonobstructive HCM sample.

721



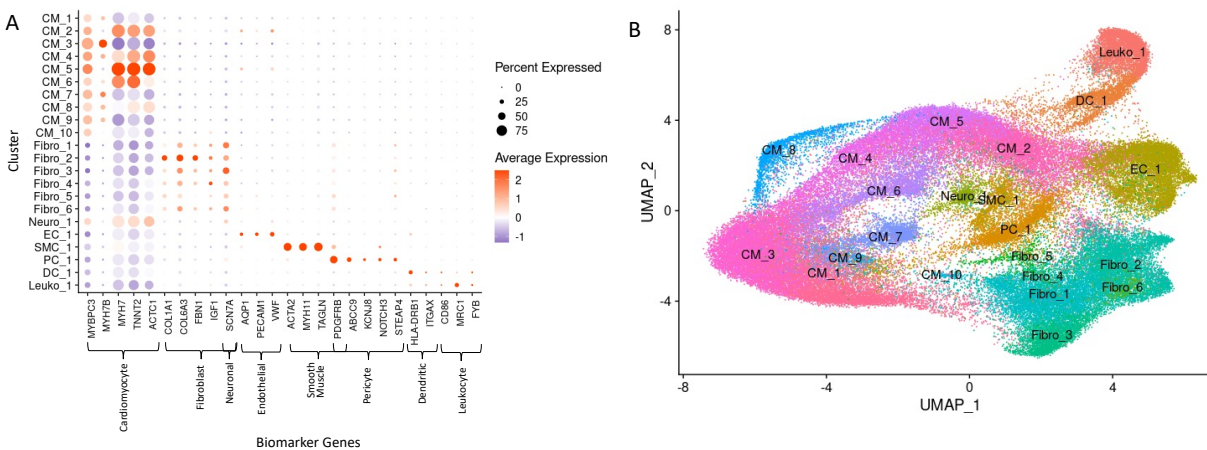

722

723

724 **Fig. 2. Biomarker Expression and Cell Identification Assignments for each Cluster. A.**

725 Biomarkers used to assign cell identity and their relative expression in each cluster. B. UMAP

726 plot of IVS tissue clusters with cell assignment labels.

727

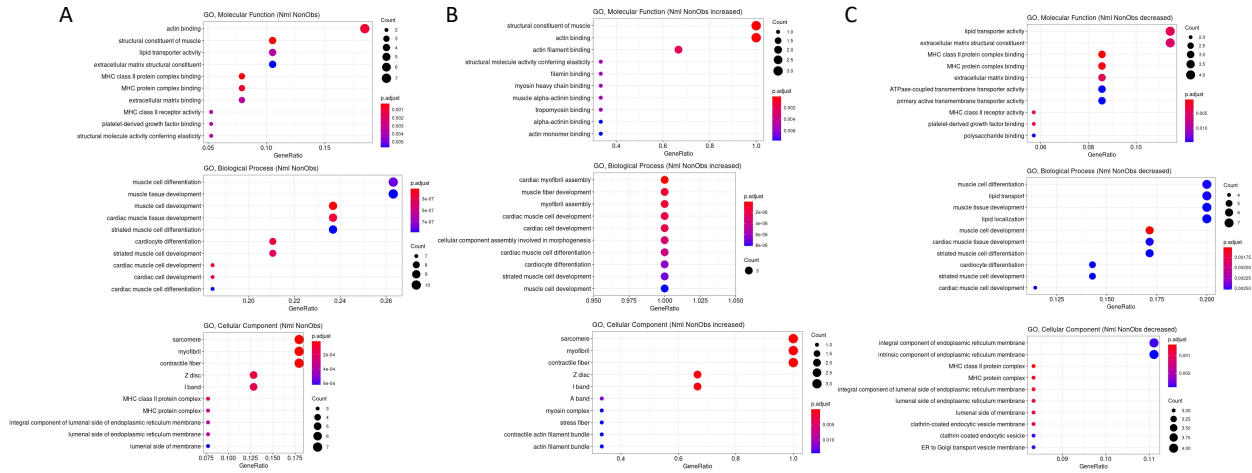

728

729

730 **Fig. 3. Gene Ontology Enrichment Analysis of Differentially Expressed Genes in**

731 **nonobstructive HCM. A. GO enrichment analysis of all differentially expressed genes in HCM**

732 **from Table 3. B. GO enrichment analysis of Table 3 genes increased in nonobstructive HCM. C.**

733 **GO enrichment analysis of Table 3 genes decreased in nonobstructive HCM.**

734

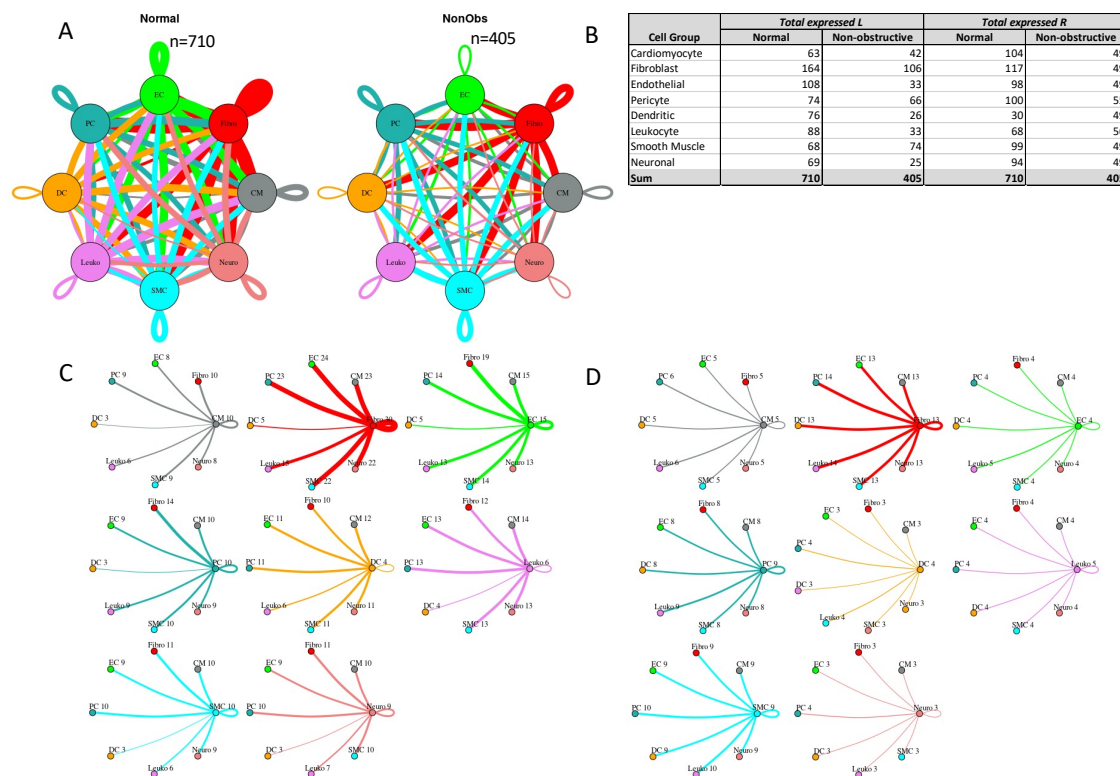

735

736 **Fig. 4. Intercellular communication networks are reduced in nonobstructive HCM. A.** Cell-cell

737 communication networks between cardiac cell types in normal control (left) and nonobstructive

738 HCM (right) conditions. Line color indicates ligand broadcast by the cell population with the

739 same color. Lines connect to cell types which expressed cognate receptors. Line thickness is

740 proportional to the number of uniquely expressed ligand-receptor pairs. Loops indicates

741 communication within a cell type. **B.** Quantity of ligands and receptors in expressed ligand-

742 receptor pairs described by cell type and condition (Normal or nonobstructive HCM). **C., D.** Cell-

743 cell communication networks broken down by cell type in normal control (**C**) and

744 nonobstructive HCM (**D**) conditions. Figure formatting follows panel A. Numbers indicate the

745 quantity of uniquely expressed ligand-receptor pairs between the broadcasting cell type

746 (expressing ligand) and receiving cell type (expressing receptor).

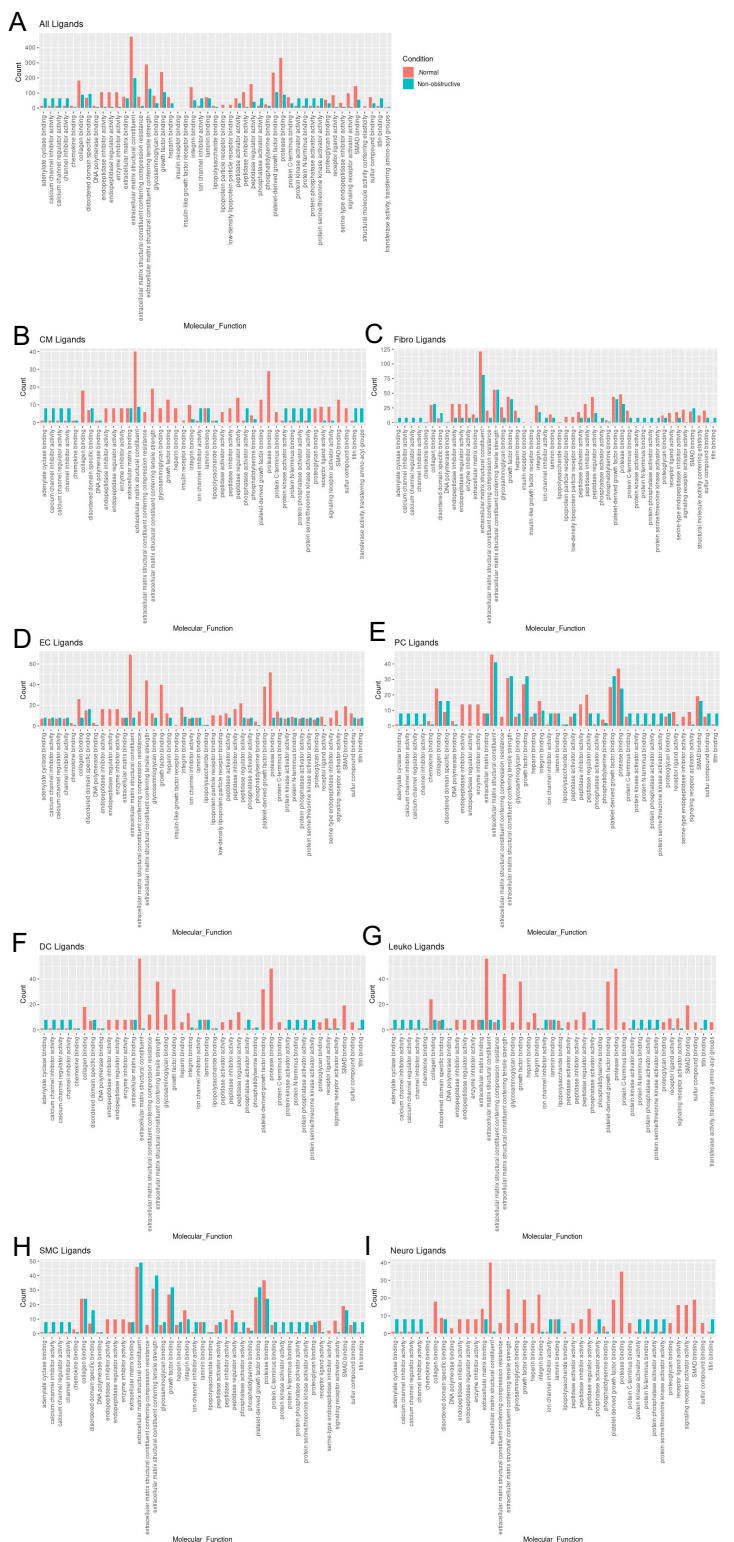

747

748

749 **Fig. 5. Bar plot representing the total count of ligands (in expressed ligand-receptor pairs)**  
750 **associated with different cellular processes in Normal and nonobstructive HCM IVS Cells.** Bar  
751 color distinguishes ligand count in normal or nonobstructive HCM conditions. **A.** Comparison of  
752 molecular functions across all cell types. **B.** Comparison in cardiomyocytes. **C.** Fibroblasts. **D.**  
753 Endothelial Cells. **E.** Pericytes. **F.** Dendritic Cells. **G.** Leukocytes. **H.** Smooth Muscle Cells. **I.**  
754 Neurons.  
755

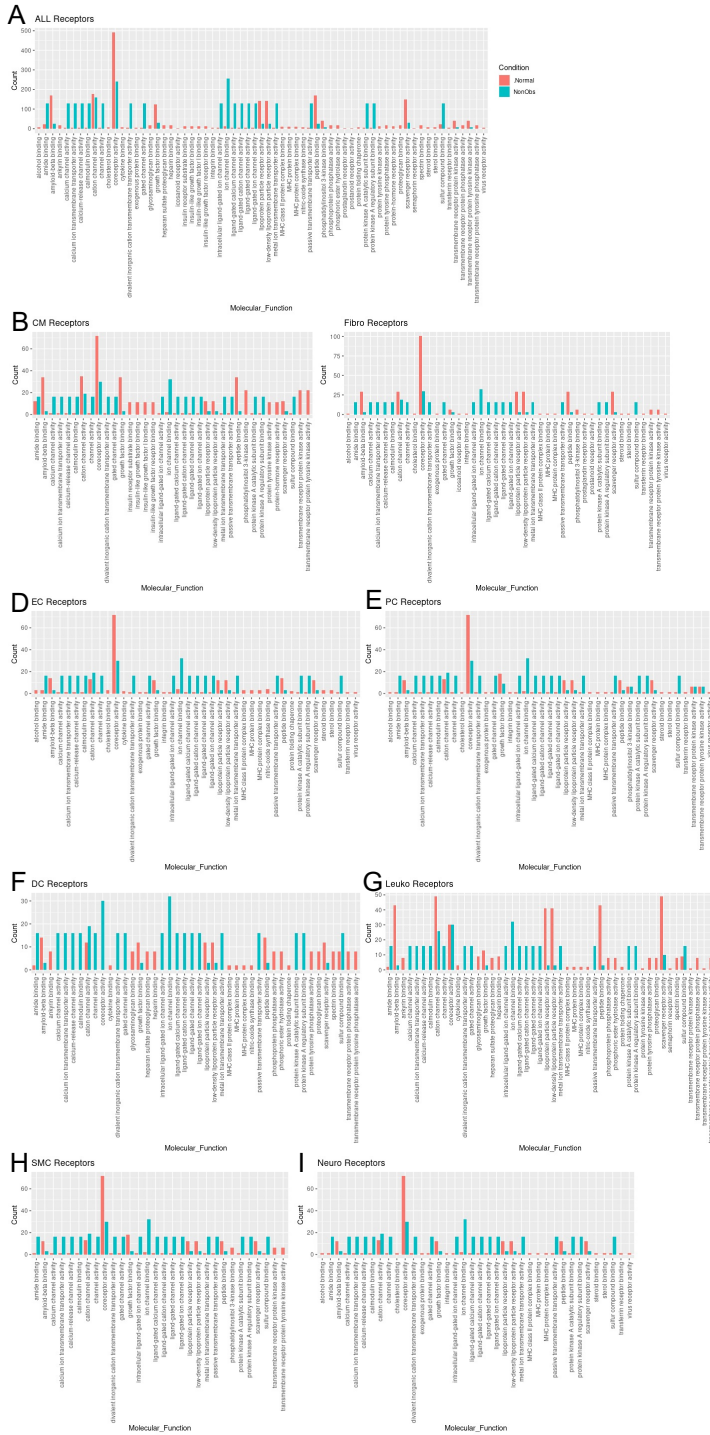

756

757

758 **Fig. 6. Bar plot representing the total count of receptors (in expressed ligand-receptor pairs)**

759 **associated with different cellular processes in Normal and nonobstructive HCM IVS Cells. Bar**

760 color distinguishes receptor count in normal or nonobstructive HCM conditions. **A.** Comparison  
761 of molecular functions across all cell types. **B.** Comparison in cardiomyocytes. **C.** Fibroblasts. **D.**  
762 Endothelial Cells. **E.** Pericytes. **F.** Dendritic Cells. **G.** Leukocytes. **H.** Smooth Muscle Cells. **I.**  
763 Neurons.  
764

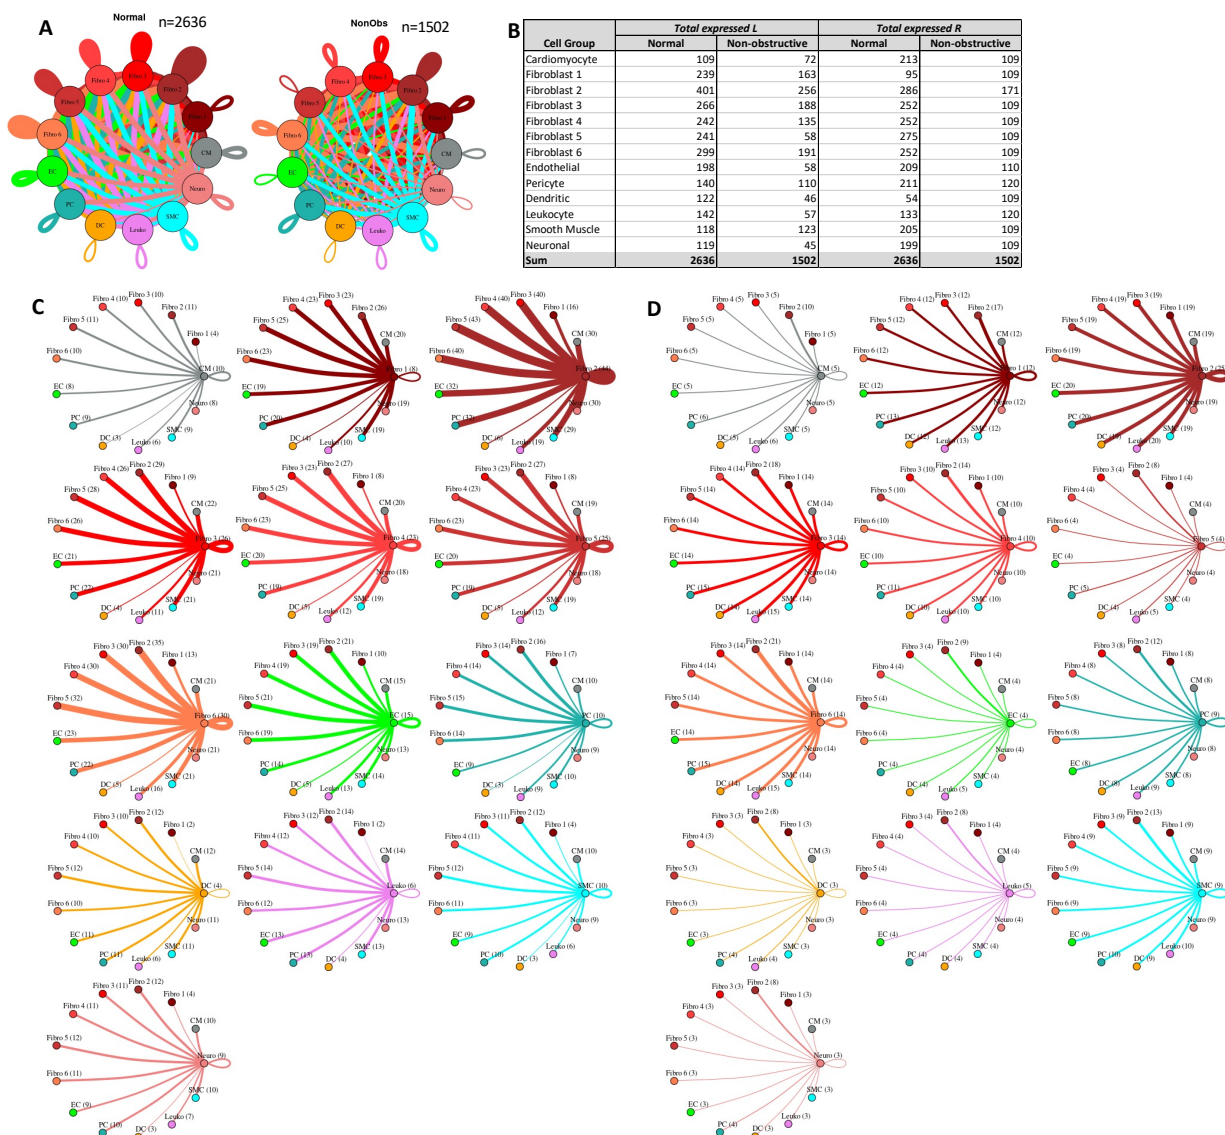

765

766

767 **Fig. 7. Cell-cell communication networks between fibroblast subtypes and other heart cells in**

768 **normal control and nonobstructive HCM conditions. A. Comparison of Normal (left) and**

769 **nonobstructive HCM (right) communication networks. Line color indicates ligand broadcast by**

770 **the cell population with the same color. Lines connect to cell types which expressed cognate**

771 **receptors. Line thickness is proportional to the number of uniquely expressed ligand-receptor**

772 **pairs. Loops indicates communication within a cell type. B. Quantity of ligands and receptors in**



773 expressed ligand-receptor pairs described by cell type and condition (Normal or nonobstructive  
774 HCM). **C, D.** Cell-cell communication networks broken down by cell type and fibroblast cluster  
775 in normal control (**C**) and nonobstructive HCM (**D**) conditions. Figure formatting follows panel A.  
776 Numbers indicate the quantity of uniquely expressed ligand-receptor pairs between the  
777 broadcasting cell type (expressing ligand) and receiving cell type (expressing receptor).  
778

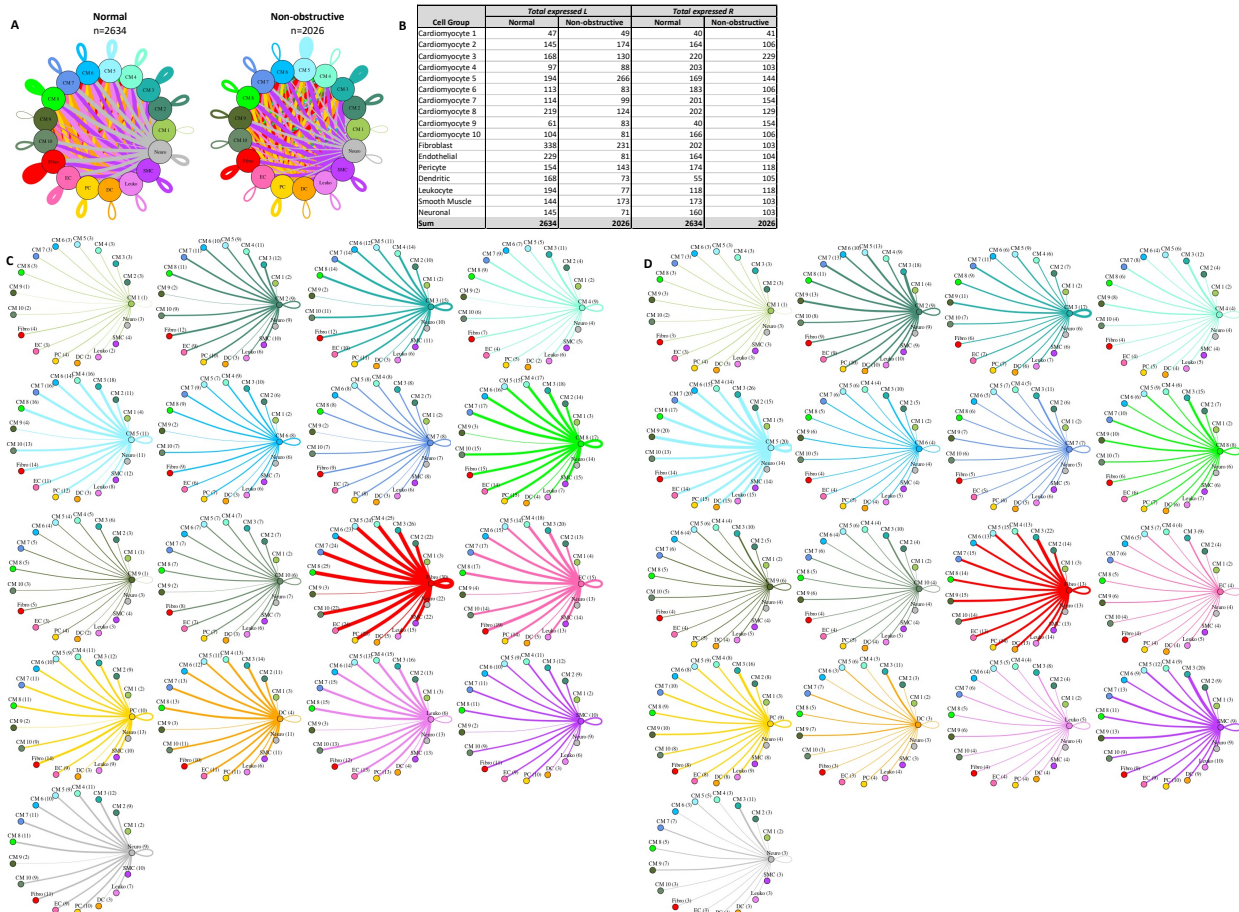

779

780

781 **Fig. 8. Cell-cell communication networks between cardiomyocyte subtypes and other heart**

782 **cells in normal control and nonobstructive HCM conditions. A.** Comparison of Normal (left)

783 and nonobstructive HCM (right) communication networks. Line color indicates ligand broadcast

784 by the cell population with the same color. Lines connect to cell types which expressed cognate

785 receptors. Line thickness is proportional to the number of uniquely expressed ligand-receptor

786 pairs. Loops indicates communication within a cell type. **B.** Quantity of ligands and receptors in

787 expressed ligand-receptor pairs described by cell type and condition (Normal or nonobstructive

788 HCM). **C, D.** Cell-cell communication networks broken down by cell type and cardiomyocyte

789 cluster in normal control (**C**) and nonobstructive HCM (**D**) conditions. Figure formatting follows

790 panel A. Numbers indicate the quantity of uniquely expressed ligand-receptor pairs between  
791 the broadcasting cell type (expressing ligand) and receiving cell type (expressing receptor).  
792

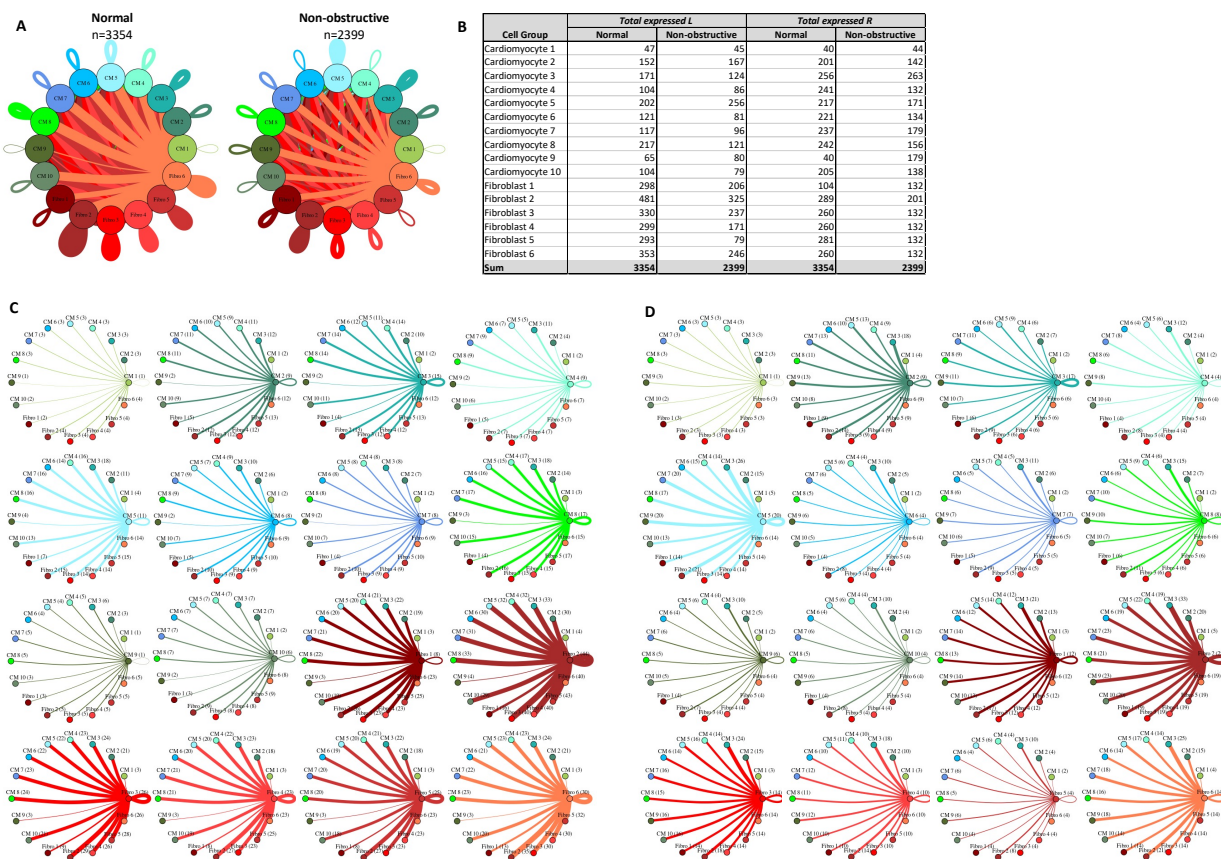

793

794

795 **Fig. 9. Cell-cell communication networks between cardiac fibroblast and cardiomyocyte**

796 **subtypes in normal control and HCM conditions. A.** Overall communication network between

797 cardiomyocytes and fibroblasts. Line color indicates ligand broadcast by the cell population with

798 the same color. Lines connect to cell types which expressed cognate receptors. Line thickness is

799 proportional to the number of uniquely expressed ligand-receptor pairs. Loops indicates

800 communication within a cell type. **B.** Quantity of ligands and receptors in expressed ligand-

801 receptor pairs described by cell type and condition (Normal or nonobstructive HCM). **C, D.** Cell-

802 cell communication networks broken down by cardiomyocyte cluster and fibroblast cluster in

803 normal control (**C**) and nonobstructive HCM (**D**) conditions. Figure formatting follows panel A.

804 Numbers indicate the quantity of uniquely expressed ligand-receptor pairs between the  
805 broadcasting cell type (expressing ligand) and receiving cell type (expressing receptor).  
806

807 Table 1. HCM Patient Characteristics

| Patient                    | 2833  | 2890                                         | 2891             | 2918                | 2930                               | 5171                         |
|----------------------------|-------|----------------------------------------------|------------------|---------------------|------------------------------------|------------------------------|
| Demographics               |       |                                              |                  |                     |                                    |                              |
| age at transplant          | 21-25 | 61-65                                        | 46-50            | 61-65               | 36-40                              | 66-70                        |
| female                     | yes   | yes                                          | no               | yes                 | yes                                | yes                          |
| nyha class>3               | yes   | yes                                          | yes              | yes                 | yes                                | yes                          |
| Med Hx                     |       |                                              |                  |                     |                                    |                              |
| Prior AF                   | no    | yes                                          | yes              | yes                 | yes                                | no                           |
| Prior VT/VF                | yes   | no                                           | no               | no                  | no                                 | yes                          |
| Prior NS VT                | no    | no                                           | no               | no                  | no                                 | yes                          |
| Prior syncope              | yes   | no                                           | yes              | no                  | no                                 | no                           |
| Fam Hx SCD                 | no    | no                                           | yes              | yes                 | no                                 | yes                          |
| Fam Hx HCM                 | no    | no                                           | yes              | yes                 | yes                                | yes                          |
| Comorbidities              |       |                                              |                  |                     |                                    |                              |
|                            | none  | HTN, HLD, COPD, DM2, CHB, OA, prior myectomy | OSA, Sarcoidosis | CAD, hypothyroidism | hypothyroidism, apical hypertrophy | asthma, HLD, apical aneurysm |
| Meds                       |       |                                              |                  |                     |                                    |                              |
| beta blocker               | yes   | yes                                          | no               | yes                 | no                                 | yes                          |
| calcium channel blocker    | no    | no                                           | no               | no                  | no                                 | no                           |
| ACE or ARB                 | no    | no                                           | no               | yes                 | no                                 | yes                          |
| Diuretic Use               | yes   | yes                                          | yes              | yes                 | yes                                | yes                          |
| loop diuretic              | yes   | yes                                          | yes              | yes                 | yes                                | yes                          |
| thiazide                   | no    | yes                                          | yes              | no                  | no                                 | yes                          |
| potassium sparing          | yes   | yes                                          | yes              | yes                 | yes                                | yes                          |
| disopyramide               | no    | no                                           | no               | no                  | no                                 | no                           |
| amiodarone                 | no    | no                                           | no               | no                  | yes                                | no                           |
| milrinone                  | yes   | yes                                          | yes              | yes                 | no                                 | yes                          |
| dofetilide                 | no    | no                                           | yes              | no                  | no                                 | no                           |
| ICD                        | yes   | yes                                          | yes              | yes                 | yes                                | yes                          |
| Physiological measurements |       |                                              |                  |                     |                                    |                              |
| LA size (mm)               | 47    | 37                                           | 36               | 64                  | 33                                 | 51                           |
| systolic blood pressure    | 95    | 103                                          | 120              | 87                  | 99                                 | 130                          |
| diastolic blood pressure   | 57    | 56                                           | 54               | 66                  | 49                                 | 67                           |
| IVS thickness (mm)         | 26    | 11 (prior myectomy)                          | 13               | 18                  | 9.5                                | 9                            |
| Posterior wall thickness   | 20    | 0.88                                         | 13               | 16                  | 7.7                                | 9                            |
| LVEF (%)                   | 15-20 | 65                                           | 60               | 45                  | 65                                 | 25-30                        |
| LVEDD (mm)                 | 51    | 46                                           | 45               | 41                  | 45                                 | 57                           |
| LVESD (m)                  | 49    | 29                                           | 28               | 35                  | 49                                 | 41                           |
| MR                         | mild  | trace                                        | no               | trace               | mild                               | mild                         |
| LGE on MRI                 | 24%   | none                                         | ND               | ND                  | none                               | ND                           |
| Pathogenic HCM Variant     |       |                                              |                  |                     |                                    |                              |
|                            | NF    | NF                                           | MYH7             | NF                  | NF                                 | MYH7                         |

808  
809

810 Table 2. Organ Donor Characteristics

| Donor                | 2867                 | 2879    | 2880         | 2884         | 2900         | 3045                  |
|----------------------|----------------------|---------|--------------|--------------|--------------|-----------------------|
| age                  | 21-25                | 56-60   | 41-45        | 41-45        | 46-50        | 66-70                 |
| female               | yes                  | no      | no           | yes          | no           | yes                   |
| cause of death       | asphyxiation         | CVA     | head trauma  | seizure      | overdose     | CVA                   |
| cardiac risk factors | none                 | none    | none         | HTN, Tobacco | none         | HLD                   |
| CAD                  | not assessed         | 20% LAD | not assessed | not assessed | not assessed | not assessed          |
| LVEF                 | 81%                  | 60%     | not assessed | 55%          | not assessed | 70%                   |
| Medications          | antidepressants, OCP | none    | unknown      | unknown      | unknown      | statin, levothyroxine |

811

812

813 Table 3. Differentially Expressed Genes in Nonobstructive HCM with Pronounced Changes in  
814 Spatial Expression

|    | Gene of Interest | Affected Cell Group       | Expression in Non-obstructive HCM | Established HCM Gene |
|----|------------------|---------------------------|-----------------------------------|----------------------|
| 1  | ABCA10           | Cardiomyocyte, Fibroblast | Decreased                         |                      |
| 2  | ABCA6            | Cardiomyocyte             | Decreased                         |                      |
| 3  | ABCA8            | Cardiomyocyte             | Decreased                         |                      |
| 4  | AC010680.1       | Cardiomyocyte             | Increased                         |                      |
| 5  | AC010680.5       | Cardiomyocyte             | Increased                         |                      |
| 6  | ADH1B            | Cardiomyocyte             | Decreased                         |                      |
| 7  | AGT              | Endothelial, Pericyte     | Decreased                         |                      |
| 8  | C1R              | Fibroblast                | Decreased                         |                      |
| 9  | C1S              | Fibroblast                | Decreased                         |                      |
| 10 | CCL21            | Endothelial               | Decreased                         |                      |
| 11 | CD74             | Dendritic                 | Decreased                         |                      |
| 12 | COL1A2           | Neuronal                  | Decreased                         |                      |
| 13 | CPE              | Pericyte                  | Decreased                         |                      |
| 14 | EMC10            | Cardiomyocyte             | Decreased                         |                      |
| 15 | FABP4            | Endothelial, Pericyte     | Decreased                         |                      |
| 16 | FBLN2            | Fibroblast                | Decreased                         |                      |
| 17 | HES1             | Fibroblast                | Decreased                         |                      |
| 18 | HES4             | Smooth Muscle             | Decreased                         |                      |
| 19 | HLA-DRA          | Dendritic                 | Decreased                         |                      |
| 20 | HLA-DRB1         | Dendritic                 | Decreased                         |                      |
| 21 | IGFBP5           | Endothelial               | Decreased                         |                      |
| 22 | MEG3             | Cardiomyocyte, Fibroblast | Decreased                         |                      |
| 23 | MMRN1            | Endothelial               | Decreased                         |                      |
| 24 | MS4A6A           | Dendritic                 | Decreased                         |                      |
| 25 | MYH7             | Neuronal                  | Decreased                         | Yes                  |
| 26 | MYH7B            | Cardiomyocyte             | Decreased                         |                      |
| 27 | MYL2             | Cardiomyocyte             | Increased                         | Yes                  |
| 28 | NDUFA4L2         | Pericyte                  | Decreased                         |                      |
| 29 | NEBL             | Cardiomyocyte             | Increased                         |                      |
| 30 | NPPB             | Cardiomyocyte             | Decreased                         |                      |
| 31 | PDGFRB           | Pericyte, Smooth Muscle   | Decreased                         |                      |
| 32 | PLA2G2A          | Cardiomyocyte             | Decreased                         |                      |
| 33 | PTGIR            | Cardiomyocyte             | Decreased                         |                      |
| 34 | RP11-394O4.5     | Smooth Muscle             | Decreased                         |                      |
| 35 | RP11-532N4.2     | Cardiomyocyte             | Decreased                         |                      |
| 36 | SAT1             | Dendritic                 | Decreased                         |                      |
| 37 | SLC8A1           | Cardiomyocyte             | Decreased                         |                      |
| 38 | SORBS2           | Cardiomyocyte             | Decreased                         |                      |
| 39 | SPARC            | Neuronal                  | Decreased                         |                      |
| 40 | SPP1             | Neuronal                  | Decreased                         |                      |
| 41 | TFPI             | Endothelial               | Decreased                         |                      |
| 42 | TMSB4X           | Endothelial               | Decreased                         |                      |
| 43 | TNNT2            | Dendritic, Neuronal       | Decreased                         | Yes                  |
| 44 | TTN              | Neuronal                  | Increased                         |                      |

815
