# Supplementary material for: Single nucleus RNA-sequencing reveals altered intercellular communication and dendritic cell activation in nonobstructive hypertrophic cardiomyopathy
Source: bioRxiv or medRxiv preprint supplement (doi:10.1101/2021.12.20.21267954), 2022-01-05
Supplement: Supplementary file [file media-1.pdf]

Supplemental Table 1. Biomarker list with citations

| Cell type      | Biomarker             | Reference                                                                                                | Note                                                         |
|----------------|-----------------------|----------------------------------------------------------------------------------------------------------|--------------------------------------------------------------|
| Cardiomyocyte  | MYBPC3                | Selewa et al., 2020; Litviňuková et al., 2020                                                            |                                                              |
|                | MYH7B                 | Cui et al., 2019                                                                                         |                                                              |
|                | MYH7                  | Cui et al., 2019; Wang et al., 2020; Litviňuková et al., 2020                                            |                                                              |
|                | TNNT2                 | Selewa et al., 2020; Lothar et al., 2018                                                                 |                                                              |
|                | LDB3                  | Jia et al., 2018                                                                                         |                                                              |
|                | FHOD3                 | Tucker et al., 2021                                                                                      |                                                              |
|                | PLN                   | Lothar et al., 2018; Litviňuková et al., 2020                                                            | Mature                                                       |
|                | ACTC1                 | Wang et al., 2020; Litviňuková et al., 2020                                                              | Mature                                                       |
|                | TNNC                  | McLellan et al., 2020; Jia et al., 2018                                                                  | Mature                                                       |
|                | GATA4                 | Jia et al., 2018; Hu et al., 2018                                                                        |                                                              |
|                | MYOCD                 | Jia et al., 2018; Hu et al., 2019                                                                        | Developing                                                   |
|                | MHRT                  | McLellan et al., 2020; Hu et al., 2019                                                                   | Developing                                                   |
|                | NPPA                  | Cui et al., 2019; Wang et al., 2020; Litviňuková et al., 2020                                            | Trabecular                                                   |
|                | MYH6                  | Lothar et al., 2018; Cui et al., 2019                                                                    |                                                              |
|                | ATP2A2                | Lothar et al., 2018; Wang et al., 2020                                                                   |                                                              |
|                | RYR2                  | Lothar et al., 2018; Litviňuková et al., 2020; Hu et al., 2019                                           |                                                              |
|                | MYL2                  | Wang et al., 2020; Litviňuková et al., 2020                                                              |                                                              |
| Fibroblasts    | FM02                  | Tucker et al., 2021                                                                                      |                                                              |
|                | POSTN                 | Cui et al., 2019; Selewa et al., 2020; McLellan et al., 2020; Litviňuková et al., 2020                   |                                                              |
|                | COL6A3                | Wang et al., 2020                                                                                        |                                                              |
|                | COL3A1                | McLellan et al., 2020; Cui et al., 2019                                                                  |                                                              |
|                | FBN1                  | McLellan et al., 2020; Hu et al., 2018                                                                   |                                                              |
|                | COL1A1                | Lothar et al., 2018; McLellan et al., 2020; Cui et al., 2019                                             |                                                              |
|                | DDR2                  | Wang et al., 2020                                                                                        |                                                              |
|                | PLEKHH2               | Tucker et al., 2021                                                                                      |                                                              |
|                | IGF1                  | Tucker et al., 2021                                                                                      |                                                              |
|                | SCN7A                 | Poulsen et al., 2020                                                                                     | Also neuronal marker                                         |
|                | COL1A2                | Cui et al., 2019                                                                                         |                                                              |
| Myofibroblasts | DES                   | Wang et al., 2020                                                                                        | Repeated in cardiomyocytes                                   |
|                | COL5A2                | Selewa et al., 2020                                                                                      |                                                              |
|                | ACTA2                 | Tarbit et al., 2019                                                                                      | Also smooth muscle                                           |
|                | PALLD                 | Tucker et al., 2021                                                                                      |                                                              |
| Endothelial    | PECAM1                | Lothar et al., 2018; Litviňuková et al., 2020; Cui et al., 2019                                          |                                                              |
|                | VWF                   | Lothar et al., 2018; Litviňuková et al., 2020                                                            |                                                              |
|                | AQP1                  | Wang et al., 2020                                                                                        |                                                              |
|                | CDH5                  | Lothar et al., 2018; Litviňuková et al., 2020                                                            |                                                              |
|                | TEK                   | Lothar et al., 2018; Wang et al., 2020; Jia et al., 2018                                                 |                                                              |
|                | KDR                   | Lothar et al., 2018; Wang et al., 2020                                                                   |                                                              |
|                | SOX7                  | Lothar et al., 2018                                                                                      | Venous                                                       |
| NF2F2          | Lothar et al., 2018   | Venous                                                                                                   |                                                              |
| Smooth Muscle  | MYH11                 | McLellan et al., 2020; Cui et al., 2019                                                                  | Classic                                                      |
|                | ACTA2                 | McLellan et al., 2020; Litviňuková et al., 2020; Wang et al., 2020                                       | Classic, repeated in myofibroblasts                          |
|                | TAGLN                 | McLellan et al., 2020                                                                                    | Classic                                                      |
|                | CNN1                  | Skelton et al., 2014                                                                                     |                                                              |
|                | OLFR55B               | McLellan et al., 2020                                                                                    |                                                              |
|                | LMOD1                 | McLellan et al., 2020                                                                                    |                                                              |
|                | NRIP2                 | McLellan et al., 2020                                                                                    |                                                              |
|                | P16                   | Cui et al., 2019                                                                                         | Immature                                                     |
|                | CP2                   | Cui et al., 2019                                                                                         | Immature                                                     |
|                | PDGFRL                | Cui et al., 2019                                                                                         | Immature                                                     |
| Pericytes      | PDGFRB                | Tucker et al., 2021; McLellan et al., 2020                                                               | Smooth Muscle and Pericyte marker, repeated in smooth muscle |
|                | PDGFRA                | McLellan et al., 2020                                                                                    | Repeated in fibroblasts                                      |
|                | COLEC11               | McLellan et al., 2020                                                                                    |                                                              |
|                | ABCC9                 | McLellan et al., 2020                                                                                    |                                                              |
|                | KCNJ8                 | McLellan et al., 2020                                                                                    |                                                              |
|                | VTN                   | McLellan et al., 2020                                                                                    |                                                              |
|                | STEAP4                | McLellan et al., 2020                                                                                    |                                                              |
|                | NOTCH3                | Wang et al., 2020; Litviňuková et al., 2020                                                              | Smooth Muscle and Pericyte marker, repeated in smooth muscle |
| Lymphatic      | LYVE1                 | McLellan et al., 2020                                                                                    |                                                              |
|                | MMRN1                 | McLellan et al., 2020                                                                                    |                                                              |
|                | CCL21A                | McLellan et al., 2020                                                                                    |                                                              |
|                | CLDN5                 | McLellan et al., 2020                                                                                    |                                                              |
|                | FLT1                  | McLellan et al., 2020                                                                                    |                                                              |
| Dendritic      | CD11C                 |                                                                                                          |                                                              |
|                | HLA-DR                | Novershtern et al., 2011; Merad et al., 2013                                                             |                                                              |
| Neuronal       | SCN7A                 | Tucker et al., 2021                                                                                      |                                                              |
|                | NOVA1                 | Tucker et al., 2021                                                                                      |                                                              |
|                | VIM                   | Tucker et al., 2021                                                                                      | Schwann, repeated in myofibroblasts, fibroblasts             |
|                | ANXA1                 | Tucker et al., 2021                                                                                      | Schwann                                                      |
| Leukocyte      | MRC1                  | Tucker et al., 2021                                                                                      |                                                              |
|                | FYB                   | Tucker et al., 2021                                                                                      |                                                              |
|                | CD86                  | Tucker et al., 2021                                                                                      |                                                              |
| Natural Killer | CD3 (not expressed)   |                                                                                                          |                                                              |
|                | CD56                  | Montaldo et al., 2013; Chen et al., 2015; Colucci et al., 2003; Farag & Caligiuri, 2006;                 |                                                              |
|                | CD94                  | Humana Press, 2007                                                                                       |                                                              |
|                | NKp46                 |                                                                                                          |                                                              |
| T              | CD2                   | Humana Press, 2007; Balon et al., 2006; Finak et al., 2016                                               |                                                              |
|                | CD19                  | Humana Press, 2007; Kaminski et al., 2012; Orlic et al., 1993; Bendall et al., 2014; Wood, 2004          |                                                              |
| B              | CD79A                 | McLellan et al., 2020                                                                                    |                                                              |
|                | LY6D                  | McLellan et al., 2020                                                                                    |                                                              |
|                | H2-DMB2               | McLellan et al., 2020                                                                                    |                                                              |
|                | CD79B                 | McLellan et al., 2020                                                                                    |                                                              |
|                | MS4A1                 | McLellan et al., 2020                                                                                    |                                                              |
| Monocyte       | CD14                  |                                                                                                          |                                                              |
|                | PTPRC (CD45)          | Novershtern et al., 2011; Wood, 2004; Yang et al., 2014                                                  |                                                              |
| Macrophage     | CSFR3R                |                                                                                                          |                                                              |
|                | CD11B                 |                                                                                                          |                                                              |
|                | CD68                  | Murray et al., 2011; Pilling et al., 2009                                                                |                                                              |
|                | CD163                 |                                                                                                          |                                                              |
|                | CSF1R                 | McLellan et al., 2020                                                                                    |                                                              |
|                | ADGRE1                | McLellan et al., 2020                                                                                    |                                                              |
|                | PLD4                  | McLellan et al., 2020                                                                                    |                                                              |
| MS4A6C         | McLellan et al., 2020 |                                                                                                          |                                                              |
| MGL2           | McLellan et al., 2020 |                                                                                                          |                                                              |
| Neutrophil     | CD11B                 |                                                                                                          |                                                              |
|                | CD16                  |                                                                                                          |                                                              |
|                | CD18                  |                                                                                                          |                                                              |
|                | CD32                  | Humana Press, 2007; Wood, 2004; Elghetany & Elghetany, 2002; Mantovani et al., 2011; Behnen et al., 2014 |                                                              |
|                | CD55                  |                                                                                                          |                                                              |

Supplemental Table 2. Consensus Cell Identity Assignments for Each Cluster (blue)

| Cluster | Cell Assignment Method  |                               |               |                            |
|---------|-------------------------|-------------------------------|---------------|----------------------------|
|         | Biomarkers              | pangloadb overexpressed genes | Gene Ontology | Inginuity Pathway Analysis |
| 0       | Cardiomyocyte           | Unknown                       | Cardiomyocyte | Cardiomyocyte              |
| 1       | Cardiomyocyte           | Unknown                       | Cardiomyocyte | Cardiomyocyte              |
| 2       | Endothelial             | Endothelial                   | Endothelial   | Endothelial                |
| 3       | Cardiomyocyte           | Unknown                       | Cardiomyocyte | Cardiomyocyte              |
| 4       | Fibroblast              | Fibroblast                    | Unknown       | Unknown                    |
| 5       | Fibroblast              | Fibroblast                    | Fibroblast    | Fibroblast                 |
| 6       | Leukocyte               | Dendritic, Unknown            | Leukocyte     | Unknown                    |
| 7       | Cardiomyocyte           | Unknown                       | Cardiomyocyte | Cardiomyocyte              |
| 8       | Cardiomyocyte           | Unknown                       | Cardiomyocyte | Cardiomyocyte              |
| 9       | Cardiomyocyte           | Unknown                       | Unknown       | Cardiomyocyte              |
| 10      | Pericyte                | Unknown                       | Pericyte      | Unknown                    |
| 11      | Dendritic, Leukocyte    | Dendritic                     | Dendritic     | Unknown                    |
| 12      | Fibroblast              | Fibroblast                    | Cardiomyocyte | Unknown                    |
| 13      | Cardiomyocyte           | Unknown                       | Cardiomyocyte | Cardiomyocyte              |
| 14      | Cardiomyocyte           | Unknown                       | Unknown       | Cardiomyocyte              |
| 15      | Smooth Muscle           | Smooth Muscle                 | Smooth Muscle | Unknown                    |
| 16      | Cardiomyocyte, Neuronal | Unknown                       | Neuronal      | Neuronal                   |
| 17      | Fibroblast              | Fibroblast                    | Unknown       | Fibroblast                 |
| 18      | Fibroblast              | Fibroblast                    | Unknown       | Unknown                    |
| 19      | Cardiomyocyte           | Unknown                       | Unknown       | Cardiomyocyte              |
| 20      | Fibroblast              | Fibroblast                    | Unknown       | Unknown                    |
| 21      | Cardiomyocyte           | Unknown                       | Cardiomyocyte | Unknown                    |

| Cell Type     | Condition       | Number of |                                |              |
|---------------|-----------------|-----------|--------------------------------|--------------|
|               |                 | Nuclei    | Differentially expressed genes | Gene overlap |
| Cardiomyocyte | Normal          | 16659     | 6695                           | 4518         |
|               | Non-obstructive | 26964     | 4851                           |              |
| Fibroblast    | Normal          | 9147      | 831                            | 206          |
|               | Non-obstructive | 9251      | 324                            |              |
| Endothelial   | Normal          | 2214      | 578                            | 164          |
|               | Non-obstructive | 5491      | 359                            |              |
| Pericyte      | Normal          | 1351      | 407                            | 48           |
|               | Non-obstructive | 2260      | 159                            |              |
| Dendritic     | Normal          | 1558      | 450                            | 51           |
|               | Non-obstructive | 1604      | 142                            |              |
| Leukocyte     | Normal          | 2457      | 226                            | 25           |
|               | Non-obstructive | 1754      | 136                            |              |
| Smooth Muscle | Normal          | 563       | 250                            | 33           |
|               | Non-obstructive | 961       | 173                            |              |
| Neuronal      | Normal          | 409       | 295                            | 18           |
|               | Non-obstructive | 725       | 115                            |              |

**Supplemental Table 3.** Number of differentially expressed genes by cell type and condition. Differentially expressed genes were determined by positive Moran's I statistic values when respective adjusted p-values were  $\leq 0.05$  and when genes were expressed in  $\geq 1\%$  of all cells in a cell type. The number of cells per cell class and number of overlapping differentially expressed genes among cell classes are also listed.

Supplemental Table 4. Differentially Expressed Genes in Nonobstructive HCM

|    | Filtered Differentially Expressed Genes Over Space | Cell Type                 |
|----|----------------------------------------------------|---------------------------|
| 1  | ABCA10                                             | Cardiomyocyte, Fibroblast |
| 2  | ABCA6                                              | Cardiomyocyte             |
| 3  | ABCA8                                              | Cardiomyocyte             |
| 4  | AC010680.1                                         | Cardiomyocyte             |
| 5  | AC010680.5                                         | Cardiomyocyte             |
| 7  | ADH1B                                              | Cardiomyocyte             |
| 8  | AGT                                                | Endothelial, Pericyte     |
| 11 | B2M                                                | Dendritic, Neuronal       |
| 12 | C1R                                                | Fibroblast                |
| 14 | CARMN                                              | Smooth Muscle             |
| 18 | CD69                                               | Dendritic                 |
| 20 | CLU                                                | Endothelial               |
| 21 | COL1A2                                             | Neuronal                  |
| 23 | DNM3OS                                             | Cardiomyocyte             |
| 24 | EDN1                                               | Endothelial               |
| 25 | EMC10                                              | Cardiomyocyte             |
| 27 | FBLN2                                              | Fibroblast                |
| 28 | GZMA                                               | Dendritic                 |
| 30 | HES4                                               | Smooth Muscle             |
| 31 | HLA-DPA1                                           | Dendritic                 |
| 33 | HLA-DRB1                                           | Dendritic                 |
| 36 | IGFBP7                                             | Endothelial, Pericyte     |
| 37 | LINC00861                                          | Dendritic                 |
| 38 | MEG3                                               | Cardiomyocyte, Fibroblast |
| 39 | MMRN1                                              | Endothelial               |
| 40 | MS4A6A                                             | Dendritic                 |
| 41 | MYH7                                               | Neuronal                  |
| 42 | MYH7B                                              | Cardiomyocyte             |
| 43 | MYL2                                               | Cardiomyocyte             |
| 44 | NDUFA4L2                                           | Pericyte                  |
| 45 | NEBL                                               | Cardiomyocyte, Neuronal   |
| 46 | NPPB                                               | Cardiomyocyte             |
| 47 | PDGFRB                                             | Pericyte, Smooth Muscle   |
| 50 | RGS1                                               | Leukocyte                 |
| 51 | RGS5                                               | Endothelial, Pericyte     |
| 52 | RP11-394O4.5                                       | Smooth Muscle             |
| 53 | RP11-532N4.2                                       | Cardiomyocyte             |
| 54 | SAT1                                               | Dendritic                 |
| 55 | SLC8A1                                             | Cardiomyocyte             |
| 57 | SPARC                                              | Neuronal                  |
| 58 | SPARCL1                                            | Pericyte                  |
| 59 | SPP1                                               | Neuronal                  |
| 60 | TFPI                                               | Endothelial               |
| 61 | TMSB4X                                             | Endothelial               |
| 63 | TTN                                                | Neuronal                  |
| 64 | VIM                                                | Neuronal                  |

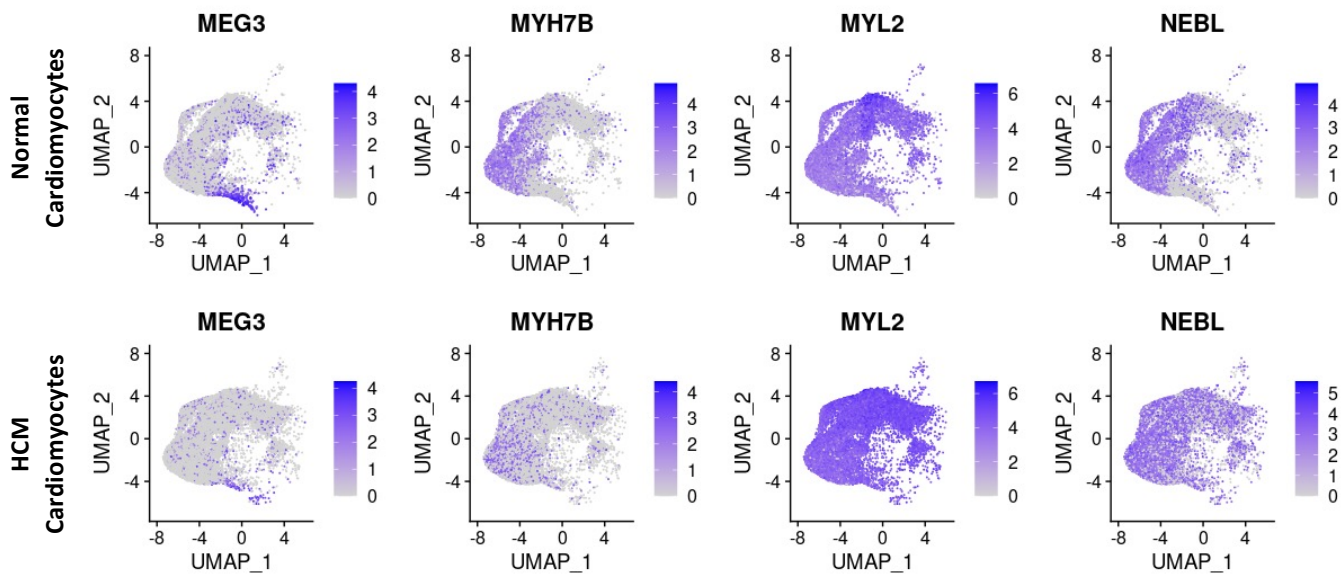

Supplemental Figure 1. Representative Differentially Expressed Genes in Cardiomyocytes, Determined by Spatial Autocorrelation, Plotted in UMAP Space

Supplemental Table 5. Increased Receptor Signaling to Dendritic Cells

| Pair_Name    | Normal |          |        |        |
|--------------|--------|----------|--------|--------|
|              | Ligand | Receptor | L_cell | R_cell |
| COL1A2_CD36  | COL1A2 | CD36     | CM     | DC     |
| LGALS1_PTPrC | LGALS1 | PTPrC    | CM     | DC     |
| TIMP1_CD63   | TIMP1  | CD63     | CM     | DC     |
| APP_CD74     | APP    | CD74     | Fibro  | DC     |
| COL1A1_CD36  | COL1A1 | CD36     | Fibro  | DC     |
| COL1A2_CD36  | COL1A2 | CD36     | Fibro  | DC     |
| LGALS1_PTPrC | LGALS1 | PTPrC    | Fibro  | DC     |
| TIMP1_CD63   | TIMP1  | CD63     | Fibro  | DC     |
| APP_CD74     | APP    | CD74     | EC     | DC     |
| COL1A1_CD36  | COL1A1 | CD36     | EC     | DC     |
| COL1A2_CD36  | COL1A2 | CD36     | EC     | DC     |
| LGALS1_PTPrC | LGALS1 | PTPrC    | EC     | DC     |
| TIMP1_CD63   | TIMP1  | CD63     | EC     | DC     |
| COL1A2_CD36  | COL1A2 | CD36     | PC     | DC     |
| LGALS1_PTPrC | LGALS1 | PTPrC    | PC     | DC     |
| TIMP1_CD63   | TIMP1  | CD63     | PC     | DC     |
| COL1A1_CD36  | COL1A1 | CD36     | DC     | DC     |
| COL1A2_CD36  | COL1A2 | CD36     | DC     | DC     |
| LGALS1_PTPrC | LGALS1 | PTPrC    | DC     | DC     |
| TIMP1_CD63   | TIMP1  | CD63     | DC     | DC     |
| COL1A1_CD36  | COL1A1 | CD36     | Leuko  | DC     |
| COL1A2_CD36  | COL1A2 | CD36     | Leuko  | DC     |
| LGALS1_PTPrC | LGALS1 | PTPrC    | Leuko  | DC     |
| TIMP1_CD63   | TIMP1  | CD63     | Leuko  | DC     |
| COL1A2_CD36  | COL1A2 | CD36     | SMC    | DC     |
| LGALS1_PTPrC | LGALS1 | PTPrC    | SMC    | DC     |
| TIMP1_CD63   | TIMP1  | CD63     | SMC    | DC     |
| COL1A2_CD36  | COL1A2 | CD36     | Neuro  | DC     |
| LGALS1_PTPrC | LGALS1 | PTPrC    | Neuro  | DC     |
| TIMP1_CD63   | TIMP1  | CD63     | Neuro  | DC     |

| Pair_Name    | Non-obstructive |          |        |        |
|--------------|-----------------|----------|--------|--------|
|              | Ligand          | Receptor | L_cell | R_cell |
| CALM1_RYR2   | CALM1           | RYR2     | CM     | DC     |
| LAMA2_ITGB1  | LAMA2           | ITGB1    | CM     | DC     |
| LGALS1_ITGB1 | LGALS1          | ITGB1    | CM     | DC     |
| S100A1_RYR2  | S100A1          | RYR2     | CM     | DC     |
| TGM2_ITGB1   | TGM2            | ITGB1    | CM     | DC     |
| CALM1_RYR2   | CALM1           | RYR2     | Fibro  | DC     |
| COL1A2_CD36  | COL1A2          | CD36     | Fibro  | DC     |
| COL1A2_ITGB1 | COL1A2          | ITGB1    | Fibro  | DC     |
| COL3A1_ITGB1 | COL3A1          | ITGB1    | Fibro  | DC     |
| COL4A1_ITGB1 | COL4A1          | ITGB1    | Fibro  | DC     |
| COL6A1_ITGB1 | COL6A1          | ITGB1    | Fibro  | DC     |
| COL6A2_ITGB1 | COL6A2          | ITGB1    | Fibro  | DC     |
| COL6A3_ITGB1 | COL6A3          | ITGB1    | Fibro  | DC     |
| FN1_ITGB1    | FN1             | ITGB1    | Fibro  | DC     |
| LAMA2_ITGB1  | LAMA2           | ITGB1    | Fibro  | DC     |
| LGALS1_ITGB1 | LGALS1          | ITGB1    | Fibro  | DC     |
| LUM_ITGB1    | LUM             | ITGB1    | Fibro  | DC     |
| S100A1_RYR2  | S100A1          | RYR2     | Fibro  | DC     |
| CALM1_RYR2   | CALM1           | RYR2     | EC     | DC     |
| FN1_ITGB1    | FN1             | ITGB1    | EC     | DC     |
| LGALS1_ITGB1 | LGALS1          | ITGB1    | EC     | DC     |
| S100A1_RYR2  | S100A1          | RYR2     | EC     | DC     |
| CALM1_RYR2   | CALM1           | RYR2     | PC     | DC     |
| COL1A2_CD36  | COL1A2          | CD36     | PC     | DC     |
| COL1A2_ITGB1 | COL1A2          | ITGB1    | PC     | DC     |
| COL4A1_ITGB1 | COL4A1          | ITGB1    | PC     | DC     |
| COL6A1_ITGB1 | COL6A1          | ITGB1    | PC     | DC     |
| FN1_ITGB1    | FN1             | ITGB1    | PC     | DC     |
| LGALS1_ITGB1 | LGALS1          | ITGB1    | PC     | DC     |
| S100A1_RYR2  | S100A1          | RYR2     | PC     | DC     |
| CALM1_RYR2   | CALM1           | RYR2     | DC     | DC     |
| LGALS1_ITGB1 | LGALS1          | ITGB1    | DC     | DC     |
| S100A1_RYR2  | S100A1          | RYR2     | DC     | DC     |
| CALM1_RYR2   | CALM1           | RYR2     | Leuko  | DC     |
| LGALS1_ITGB1 | LGALS1          | ITGB1    | Leuko  | DC     |
| LUM_ITGB1    | LUM             | ITGB1    | Leuko  | DC     |
| S100A1_RYR2  | S100A1          | RYR2     | Leuko  | DC     |
| CALM1_RYR2   | CALM1           | RYR2     | SMC    | DC     |
| COL1A2_CD36  | COL1A2          | CD36     | SMC    | DC     |
| COL1A2_ITGB1 | COL1A2          | ITGB1    | SMC    | DC     |
| COL4A1_ITGB1 | COL4A1          | ITGB1    | SMC    | DC     |
| COL6A1_ITGB1 | COL6A1          | ITGB1    | SMC    | DC     |
| COL6A2_ITGB1 | COL6A2          | ITGB1    | SMC    | DC     |
| FN1_ITGB1    | FN1             | ITGB1    | SMC    | DC     |
| LGALS1_ITGB1 | LGALS1          | ITGB1    | SMC    | DC     |
| S100A1_RYR2  | S100A1          | RYR2     | SMC    | DC     |
| CALM1_RYR2   | CALM1           | RYR2     | Neuro  | DC     |
| LGALS1_ITGB1 | LGALS1          | ITGB1    | Neuro  | DC     |
| S100A1_RYR2  | S100A1          | RYR2     | Neuro  | DC     |

Supplemental Table 6. Increased Smooth Muscle to Leukocyte Communication in Nonobstructive HCM

| <i>Normal</i>    |               |                 |               |               |
|------------------|---------------|-----------------|---------------|---------------|
| <b>Pair_Name</b> | <b>Ligand</b> | <b>Receptor</b> | <b>L_cell</b> | <b>R_cell</b> |
| A2M_LRP1         | A2M           | LRP1            | SMC           | Leuko         |
| COL1A2_CD36      | COL1A2        | CD36            | SMC           | Leuko         |
| HMGB1_CD163      | HMGB1         | CD163           | SMC           | Leuko         |
| LGALS1_PTPRC     | LGALS1        | PTPRC           | SMC           | Leuko         |
| PSAP_LRP1        | PSAP          | LRP1            | SMC           | Leuko         |
| TIMP1_CD63       | TIMP1         | CD63            | SMC           | Leuko         |

| <i>Non-obstructive</i> |               |                 |               |               |
|------------------------|---------------|-----------------|---------------|---------------|
| <b>Pair_Name</b>       | <b>Ligand</b> | <b>Receptor</b> | <b>L_cell</b> | <b>R_cell</b> |
| CALM1_RYR2             | CALM1         | RYR2            | SMC           | Leuko         |
| COL1A2_CD36            | COL1A2        | CD36            | SMC           | Leuko         |
| COL1A2_ITGB1           | COL1A2        | ITGB1           | SMC           | Leuko         |
| COL4A1_ITGB1           | COL4A1        | ITGB1           | SMC           | Leuko         |
| COL6A1_ITGB1           | COL6A1        | ITGB1           | SMC           | Leuko         |
| COL6A2_ITGB1           | COL6A2        | ITGB1           | SMC           | Leuko         |
| FN1_ITGB1              | FN1           | ITGB1           | SMC           | Leuko         |
| HMGB1_CD163            | HMGB1         | CD163           | SMC           | Leuko         |
| LGALS1_ITGB1           | LGALS1        | ITGB1           | SMC           | Leuko         |
| S100A1_RYR2            | S100A1        | RYR2            | SMC           | Leuko         |





Supplemental Table 8. Fibroblast Cluster 5 Communication with Fibroblast Clusters 2-6

| Pair Name     | Normal   |          |         |         |
|---------------|----------|----------|---------|---------|
|               | Ligand   | Receptor | L cell  | R cell  |
| APP_LRP1      | APP      | LRP1     | Fibro 5 | Fibro 2 |
| COL1A1_ITGB1  | COL1A1   | ITGB1    | Fibro 5 | Fibro 2 |
| COL1A2_ITGB1  | COL1A2   | ITGB1    | Fibro 5 | Fibro 2 |
| COL1A1_ITGB1  | COL1A1   | ITGB1    | Fibro 5 | Fibro 2 |
| COL1A1_ITGB1  | COL1A1   | ITGB1    | Fibro 5 | Fibro 2 |
| COL6A2_ITGB1  | COL6A2   | ITGB1    | Fibro 5 | Fibro 2 |
| COL6A3_ITGB1  | COL6A3   | ITGB1    | Fibro 5 | Fibro 2 |
| FBLN1_ITGB1   | FBLN1    | ITGB1    | Fibro 5 | Fibro 2 |
| FN1_ITGB1     | FN1      | ITGB1    | Fibro 5 | Fibro 2 |
| FN1_SDC2      | FN1      | SDC2     | Fibro 5 | Fibro 2 |
| HLA-A_ABP2    | HLA-A    | ABP2     | Fibro 5 | Fibro 2 |
| HSPG2_ITGB1   | HSPG2    | ITGB1    | Fibro 5 | Fibro 2 |
| HSPG2_LRP1    | HSPG2    | LRP1     | Fibro 5 | Fibro 2 |
| LAMA2_ITGB1   | LAMA2    | ITGB1    | Fibro 5 | Fibro 2 |
| LAMC1_ITGB1   | LAMC1    | ITGB1    | Fibro 5 | Fibro 2 |
| LGALS1_ITGB1  | LGALS1   | ITGB1    | Fibro 5 | Fibro 2 |
| LUM_ITGB1     | LUM      | ITGB1    | Fibro 5 | Fibro 2 |
| MFGE8_PDGFRB  | MFGE8    | PDGFRB   | Fibro 5 | Fibro 2 |
| MMMP2_SDC2    | MMMP2    | SDC2     | Fibro 5 | Fibro 2 |
| PSAP_LRP1     | PSAP     | LRP1     | Fibro 5 | Fibro 2 |
| SERPINE2_LRP1 | SERPINE2 | LRP1     | Fibro 5 | Fibro 2 |
| SERPING1_LRP1 | SERPING1 | LRP1     | Fibro 5 | Fibro 2 |
| TFPI_LRP1     | TFPI     | LRP1     | Fibro 5 | Fibro 2 |
| TIMP1_CD63    | TIMP1    | CD63     | Fibro 5 | Fibro 2 |
| VCAN_ITGB1    | VCAN     | ITGB1    | Fibro 5 | Fibro 2 |
| APP_LRP1      | APP      | LRP1     | Fibro 5 | Fibro 3 |
| COL1A1_ITGB1  | COL1A1   | ITGB1    | Fibro 5 | Fibro 3 |
| COL1A2_ITGB1  | COL1A2   | ITGB1    | Fibro 5 | Fibro 3 |
| COL1A1_ITGB1  | COL1A1   | ITGB1    | Fibro 5 | Fibro 3 |
| COL1A1_ITGB1  | COL1A1   | ITGB1    | Fibro 5 | Fibro 3 |
| COL6A2_ITGB1  | COL6A2   | ITGB1    | Fibro 5 | Fibro 3 |
| COL6A3_ITGB1  | COL6A3   | ITGB1    | Fibro 5 | Fibro 3 |
| FBLN1_ITGB1   | FBLN1    | ITGB1    | Fibro 5 | Fibro 3 |
| FBN1_ITGB1    | FBN1     | ITGB1    | Fibro 5 | Fibro 3 |
| FN1_ITGB1     | FN1      | ITGB1    | Fibro 5 | Fibro 3 |
| HSPG2_ITGB1   | HSPG2    | ITGB1    | Fibro 5 | Fibro 3 |
| HSPG2_LRP1    | HSPG2    | LRP1     | Fibro 5 | Fibro 3 |
| LAMA2_ITGB1   | LAMA2    | ITGB1    | Fibro 5 | Fibro 3 |
| LAMC1_ITGB1   | LAMC1    | ITGB1    | Fibro 5 | Fibro 3 |
| LGALS1_ITGB1  | LGALS1   | ITGB1    | Fibro 5 | Fibro 3 |
| LUM_ITGB1     | LUM      | ITGB1    | Fibro 5 | Fibro 3 |
| MFGE8_PDGFRB  | MFGE8    | PDGFRB   | Fibro 5 | Fibro 3 |
| PSAP_LRP1     | PSAP     | LRP1     | Fibro 5 | Fibro 3 |
| SERPINE2_LRP1 | SERPINE2 | LRP1     | Fibro 5 | Fibro 3 |
| SERPINE2_LRP1 | SERPINE2 | LRP1     | Fibro 5 | Fibro 3 |
| SERPING1_LRP1 | SERPING1 | LRP1     | Fibro 5 | Fibro 3 |
| TFPI_LRP1     | TFPI     | LRP1     | Fibro 5 | Fibro 3 |
| TIMP1_CD63    | TIMP1    | CD63     | Fibro 5 | Fibro 3 |
| VCAN_ITGB1    | VCAN     | ITGB1    | Fibro 5 | Fibro 3 |
| APP_LRP1      | APP      | LRP1     | Fibro 5 | Fibro 4 |
| COL1A1_ITGB1  | COL1A1   | ITGB1    | Fibro 5 | Fibro 4 |
| COL1A2_ITGB1  | COL1A2   | ITGB1    | Fibro 5 | Fibro 4 |
| COL1A1_ITGB1  | COL1A1   | ITGB1    | Fibro 5 | Fibro 4 |
| COL1A1_ITGB1  | COL1A1   | ITGB1    | Fibro 5 | Fibro 4 |
| COL6A2_ITGB1  | COL6A2   | ITGB1    | Fibro 5 | Fibro 4 |
| COL6A3_ITGB1  | COL6A3   | ITGB1    | Fibro 5 | Fibro 4 |
| FBLN1_ITGB1   | FBLN1    | ITGB1    | Fibro 5 | Fibro 4 |
| FBN1_ITGB1    | FBN1     | ITGB1    | Fibro 5 | Fibro 4 |
| FN1_ITGB1     | FN1      | ITGB1    | Fibro 5 | Fibro 4 |
| HSPG2_ITGB1   | HSPG2    | ITGB1    | Fibro 5 | Fibro 4 |
| HSPG2_LRP1    | HSPG2    | LRP1     | Fibro 5 | Fibro 4 |
| LAMA2_ITGB1   | LAMA2    | ITGB1    | Fibro 5 | Fibro 4 |
| LAMC1_ITGB1   | LAMC1    | ITGB1    | Fibro 5 | Fibro 4 |
| LGALS1_ITGB1  | LGALS1   | ITGB1    | Fibro 5 | Fibro 4 |
| LUM_ITGB1     | LUM      | ITGB1    | Fibro 5 | Fibro 4 |
| MFGE8_PDGFRB  | MFGE8    | PDGFRB   | Fibro 5 | Fibro 4 |
| PSAP_LRP1     | PSAP     | LRP1     | Fibro 5 | Fibro 4 |
| SERPINE2_LRP1 | SERPINE2 | LRP1     | Fibro 5 | Fibro 4 |
| SERPINE2_LRP1 | SERPINE2 | LRP1     | Fibro 5 | Fibro 4 |
| SERPING1_LRP1 | SERPING1 | LRP1     | Fibro 5 | Fibro 4 |
| TFPI_LRP1     | TFPI     | LRP1     | Fibro 5 | Fibro 4 |
| TIMP1_CD63    | TIMP1    | CD63     | Fibro 5 | Fibro 4 |
| VCAN_ITGB1    | VCAN     | ITGB1    | Fibro 5 | Fibro 4 |
| APP_LRP1      | APP      | LRP1     | Fibro 5 | Fibro 5 |
| COL1A1_CD36   | COL1A1   | CD36     | Fibro 5 | Fibro 5 |
| COL1A1_ITGB1  | COL1A1   | ITGB1    | Fibro 5 | Fibro 5 |
| COL1A2_CD36   | COL1A2   | CD36     | Fibro 5 | Fibro 5 |
| COL1A2_ITGB1  | COL1A2   | ITGB1    | Fibro 5 | Fibro 5 |
| COL1A1_ITGB1  | COL1A1   | ITGB1    | Fibro 5 | Fibro 5 |
| COL6A1_ITGB1  | COL6A1   | ITGB1    | Fibro 5 | Fibro 5 |
| COL6A2_ITGB1  | COL6A2   | ITGB1    | Fibro 5 | Fibro 5 |
| COL6A3_ITGB1  | COL6A3   | ITGB1    | Fibro 5 | Fibro 5 |
| FBLN1_ITGB1   | FBLN1    | ITGB1    | Fibro 5 | Fibro 5 |
| FBN1_ITGB1    | FBN1     | ITGB1    | Fibro 5 | Fibro 5 |
| FN1_ITGB1     | FN1      | ITGB1    | Fibro 5 | Fibro 5 |
| HSPG2_ITGB1   | HSPG2    | ITGB1    | Fibro 5 | Fibro 5 |
| HSPG2_LRP1    | HSPG2    | LRP1     | Fibro 5 | Fibro 5 |
| LAMA2_ITGB1   | LAMA2    | ITGB1    | Fibro 5 | Fibro 5 |
| LAMC1_ITGB1   | LAMC1    | ITGB1    | Fibro 5 | Fibro 5 |
| LGALS1_ITGB1  | LGALS1   | ITGB1    | Fibro 5 | Fibro 5 |
| LUM_ITGB1     | LUM      | ITGB1    | Fibro 5 | Fibro 5 |
| MFGE8_PDGFRB  | MFGE8    | PDGFRB   | Fibro 5 | Fibro 5 |
| PSAP_LRP1     | PSAP     | LRP1     | Fibro 5 | Fibro 5 |
| SERPINE2_LRP1 | SERPINE2 | LRP1     | Fibro 5 | Fibro 5 |
| SERPINE2_LRP1 | SERPINE2 | LRP1     | Fibro 5 | Fibro 5 |
| SERPING1_LRP1 | SERPING1 | LRP1     | Fibro 5 | Fibro 5 |
| TFPI_LRP1     | TFPI     | LRP1     | Fibro 5 | Fibro 5 |
| TIMP1_CD63    | TIMP1    | CD63     | Fibro 5 | Fibro 5 |
| VCAN_ITGB1    | VCAN     | ITGB1    | Fibro 5 | Fibro 5 |
| APP_LRP1      | APP      | LRP1     | Fibro 5 | Fibro 6 |
| COL1A1_ITGB1  | COL1A1   | ITGB1    | Fibro 5 | Fibro 6 |
| COL1A2_ITGB1  | COL1A2   | ITGB1    | Fibro 5 | Fibro 6 |
| COL1A1_ITGB1  | COL1A1   | ITGB1    | Fibro 5 | Fibro 6 |
| COL1A1_ITGB1  | COL1A1   | ITGB1    | Fibro 5 | Fibro 6 |
| COL6A1_ITGB1  | COL6A1   | ITGB1    | Fibro 5 | Fibro 6 |
| COL6A2_ITGB1  | COL6A2   | ITGB1    | Fibro 5 | Fibro 6 |
| COL6A3_ITGB1  | COL6A3   | ITGB1    | Fibro 5 | Fibro 6 |
| FBLN1_ITGB1   | FBLN1    | ITGB1    | Fibro 5 | Fibro 6 |
| FBN1_ITGB1    | FBN1     | ITGB1    | Fibro 5 | Fibro 6 |
| FN1_ITGB1     | FN1      | ITGB1    | Fibro 5 | Fibro 6 |
| HSPG2_ITGB1   | HSPG2    | ITGB1    | Fibro 5 | Fibro 6 |
| HSPG2_LRP1    | HSPG2    | LRP1     | Fibro 5 | Fibro 6 |
| LAMA2_ITGB1   | LAMA2    | ITGB1    | Fibro 5 | Fibro 6 |
| LAMC1_ITGB1   | LAMC1    | ITGB1    | Fibro 5 | Fibro 6 |
| LGALS1_ITGB1  | LGALS1   | ITGB1    | Fibro 5 | Fibro 6 |
| LUM_ITGB1     | LUM      | ITGB1    | Fibro 5 | Fibro 6 |
| MFGE8_PDGFRB  | MFGE8    | PDGFRB   | Fibro 5 | Fibro 6 |
| PSAP_LRP1     | PSAP     | LRP1     | Fibro 5 | Fibro 6 |
| SERPINE2_LRP1 | SERPINE2 | LRP1     | Fibro 5 | Fibro 6 |
| SERPINE2_LRP1 | SERPINE2 | LRP1     | Fibro 5 | Fibro 6 |
| SERPING1_LRP1 | SERPING1 | LRP1     | Fibro 5 | Fibro 6 |
| TFPI_LRP1     | TFPI     | LRP1     | Fibro 5 | Fibro 6 |
| TIMP1_CD63    | TIMP1    | CD63     | Fibro 5 | Fibro 6 |
| VCAN_ITGB1    | VCAN     | ITGB1    | Fibro 5 | Fibro 6 |

  

| Pair Name     | Non-obstructive |          |         |         |
|---------------|-----------------|----------|---------|---------|
|               | Ligand          | Receptor | L cell  | R cell  |
| A2M_LRP1      | A2M             | LRP1     | Fibro 5 | Fibro 2 |
| CALM1_RYR2    | CALM1           | RYR2     | Fibro 5 | Fibro 2 |
| FN1_ITGB1     | FN1             | ITGB1    | Fibro 5 | Fibro 2 |
| HSP90AA1_LRP1 | HSP90AA1        | LRP1     | Fibro 5 | Fibro 2 |
| LPL_LRP1      | LPL             | LRP1     | Fibro 5 | Fibro 2 |
| LUM_ITGB1     | LUM             | ITGB1    | Fibro 5 | Fibro 2 |
| PSAP_LRP1     | PSAP            | LRP1     | Fibro 5 | Fibro 2 |
| S100A1_RYR2   | S100A1          | RYR2     | Fibro 5 | Fibro 2 |
| CALM1_RYR2    | CALM1           | RYR2     | Fibro 5 | Fibro 3 |
| FN1_ITGB1     | FN1             | ITGB1    | Fibro 5 | Fibro 3 |
| LUM_ITGB1     | LUM             | ITGB1    | Fibro 5 | Fibro 3 |
| S100A1_RYR2   | S100A1          | RYR2     | Fibro 5 | Fibro 3 |
| CALM1_RYR2    | CALM1           | RYR2     | Fibro 5 | Fibro 4 |
| FN1_ITGB1     | FN1             | ITGB1    | Fibro 5 | Fibro 4 |
| LUM_ITGB1     | LUM             | ITGB1    | Fibro 5 | Fibro 4 |
| S100A1_RYR2   | S100A1          | RYR2     | Fibro 5 | Fibro 4 |
| CALM1_RYR2    | CALM1           | RYR2     | Fibro 5 | Fibro 5 |
| FN1_ITGB1     | FN1             | ITGB1    | Fibro 5 | Fibro 5 |
| LUM_ITGB1     | LUM             | ITGB1    | Fibro 5 | Fibro 5 |
| S100A1_RYR2   | S100A1          | RYR2     | Fibro 5 | Fibro 5 |
| CALM1_RYR2    | CALM1           | RYR2     | Fibro 5 | Fibro 6 |
| FN1_ITGB1     | FN1             | ITGB1    | Fibro 5 | Fibro 6 |
| LUM_ITGB1     | LUM             | ITGB1    | Fibro 5 | Fibro 6 |
| S100A1_RYR2   | S100A1          | RYR2     | Fibro 5 | Fibro 6 |

Supplemental Table 9. Fibroblast Communication with Fibroblasts and Cardiomyocyte Cluster 4

| Pair_Name     | Normal   |          |        |        |
|---------------|----------|----------|--------|--------|
|               | Ligand   | Receptor | L_cell | R_cell |
| APP_LRP1      | APP      | LRP1     | Fibro  | Fibro  |
| C3_CD81       | C3       | CD81     | Fibro  | Fibro  |
| C3_LRP1       | C3       | LRP1     | Fibro  | Fibro  |
| COL1A1_ITGB1  | COL1A1   | ITGB1    | Fibro  | Fibro  |
| COL1A2_ITGB1  | COL1A2   | ITGB1    | Fibro  | Fibro  |
| COL3A1_ITGB1  | COL3A1   | ITGB1    | Fibro  | Fibro  |
| COL4A1_ITGB1  | COL4A1   | ITGB1    | Fibro  | Fibro  |
| COL6A1_ITGB1  | COL6A1   | ITGB1    | Fibro  | Fibro  |
| COL6A2_ITGB1  | COL6A2   | ITGB1    | Fibro  | Fibro  |
| COL6A3_ITGB1  | COL6A3   | ITGB1    | Fibro  | Fibro  |
| CTGF_LRP1     | CTGF     | LRP1     | Fibro  | Fibro  |
| FBLN1_ITGB1   | FBLN1    | ITGB1    | Fibro  | Fibro  |
| FBN1_ITGB1    | FBN1     | ITGB1    | Fibro  | Fibro  |
| FN1_ITGB1     | FN1      | ITGB1    | Fibro  | Fibro  |
| HSP90B1_LRP1  | HSP90B1  | LRP1     | Fibro  | Fibro  |
| HSPG2_ITGB1   | HSPG2    | ITGB1    | Fibro  | Fibro  |
| HSPG2_LRP1    | HSPG2    | LRP1     | Fibro  | Fibro  |
| LAMA2_ITGB1   | LAMA2    | ITGB1    | Fibro  | Fibro  |
| LAMB1_ITGB1   | LAMB1    | ITGB1    | Fibro  | Fibro  |
| LAMC1_ITGB1   | LAMC1    | ITGB1    | Fibro  | Fibro  |
| LGALS1_ITGB1  | LGALS1   | ITGB1    | Fibro  | Fibro  |
| LUM_ITGB1     | LUM      | ITGB1    | Fibro  | Fibro  |
| MFGE8_PDGFRR8 | MFGE8    | PDGFRR8  | Fibro  | Fibro  |
| NID1_ITGB1    | NID1     | ITGB1    | Fibro  | Fibro  |
| PSAP_LRP1     | PSAP     | LRP1     | Fibro  | Fibro  |
| SERPINE2_LRP1 | SERPINE2 | LRP1     | Fibro  | Fibro  |
| SERPING1_LRP1 | SERPING1 | LRP1     | Fibro  | Fibro  |
| TFPI_LRP1     | TFPI     | LRP1     | Fibro  | Fibro  |
| TIMP1_CD63    | TIMP1    | CD63     | Fibro  | Fibro  |
| VCAN_ITGB1    | VCAN     | ITGB1    | Fibro  | Fibro  |
| APP_CAV1      | APP      | CAV1     | Fibro  | CM 4   |
| CALM2_CACNA1C | CALM2    | CACNA1C  | Fibro  | CM 4   |
| CALM2_INSR    | CALM2    | INSR     | Fibro  | CM 4   |
| COL1A1_CD36   | COL1A1   | CD36     | Fibro  | CM 4   |
| COL1A1_ITGB1  | COL1A1   | ITGB1    | Fibro  | CM 4   |
| COL1A2_CD36   | COL1A2   | CD36     | Fibro  | CM 4   |
| COL1A2_ITGB1  | COL1A2   | ITGB1    | Fibro  | CM 4   |
| COL3A1_ITGB1  | COL3A1   | ITGB1    | Fibro  | CM 4   |
| COL4A1_ITGB1  | COL4A1   | ITGB1    | Fibro  | CM 4   |
| COL6A1_ITGB1  | COL6A1   | ITGB1    | Fibro  | CM 4   |
| COL6A2_ITGB1  | COL6A2   | ITGB1    | Fibro  | CM 4   |
| COL6A3_ITGB1  | COL6A3   | ITGB1    | Fibro  | CM 4   |
| FBLN1_ITGB1   | FBLN1    | ITGB1    | Fibro  | CM 4   |
| FBN1_ITGB1    | FBN1     | ITGB1    | Fibro  | CM 4   |
| FN1_ITGB1     | FN1      | ITGB1    | Fibro  | CM 4   |
| HSPG2_ITGB1   | HSPG2    | ITGB1    | Fibro  | CM 4   |
| IGF1_INSR     | IGF1     | INSR     | Fibro  | CM 4   |
| LAMA2_ITGB1   | LAMA2    | ITGB1    | Fibro  | CM 4   |
| LAMB1_ITGB1   | LAMB1    | ITGB1    | Fibro  | CM 4   |
| LAMC1_ITGB1   | LAMC1    | ITGB1    | Fibro  | CM 4   |
| LGALS1_ITGB1  | LGALS1   | ITGB1    | Fibro  | CM 4   |
| LUM_ITGB1     | LUM      | ITGB1    | Fibro  | CM 4   |
| NID1_ITGB1    | NID1     | ITGB1    | Fibro  | CM 4   |
| TIMP1_CD63    | TIMP1    | CD63     | Fibro  | CM 4   |
| VCAN_ITGB1    | VCAN     | ITGB1    | Fibro  | CM 4   |

| Pair_Name    | Non-obstructive |          |        |        |
|--------------|-----------------|----------|--------|--------|
|              | Ligand          | Receptor | L_cell | R_cell |
| CALM1_RYR2   | CALM1           | RYR2     | Fibro  | Fibro  |
| COL1A2_CD36  | COL1A2          | CD36     | Fibro  | Fibro  |
| COL1A2_ITGB1 | COL1A2          | ITGB1    | Fibro  | Fibro  |
| COL3A1_ITGB1 | COL3A1          | ITGB1    | Fibro  | Fibro  |
| COL4A1_ITGB1 | COL4A1          | ITGB1    | Fibro  | Fibro  |
| COL6A1_ITGB1 | COL6A1          | ITGB1    | Fibro  | Fibro  |
| COL6A2_ITGB1 | COL6A2          | ITGB1    | Fibro  | Fibro  |
| COL6A3_ITGB1 | COL6A3          | ITGB1    | Fibro  | Fibro  |
| FN1_ITGB1    | FN1             | ITGB1    | Fibro  | Fibro  |
| LAMA2_ITGB1  | LAMA2           | ITGB1    | Fibro  | Fibro  |
| LGALS1_ITGB1 | LGALS1          | ITGB1    | Fibro  | Fibro  |
| LUM_ITGB1    | LUM             | ITGB1    | Fibro  | Fibro  |
| S100A1_RYR2  | S100A1          | RYR2     | Fibro  | Fibro  |
| CALM1_RYR2   | CALM1           | RYR2     | Fibro  | CM 4   |
| COL1A2_CD36  | COL1A2          | CD36     | Fibro  | CM 4   |
| COL1A2_ITGB1 | COL1A2          | ITGB1    | Fibro  | CM 4   |
| COL3A1_ITGB1 | COL3A1          | ITGB1    | Fibro  | CM 4   |
| COL4A1_ITGB1 | COL4A1          | ITGB1    | Fibro  | CM 4   |
| COL6A1_ITGB1 | COL6A1          | ITGB1    | Fibro  | CM 4   |
| COL6A2_ITGB1 | COL6A2          | ITGB1    | Fibro  | CM 4   |
| COL6A3_ITGB1 | COL6A3          | ITGB1    | Fibro  | CM 4   |
| FN1_ITGB1    | FN1             | ITGB1    | Fibro  | CM 4   |
| LAMA2_ITGB1  | LAMA2           | ITGB1    | Fibro  | CM 4   |
| LGALS1_ITGB1 | LGALS1          | ITGB1    | Fibro  | CM 4   |
| LUM_ITGB1    | LUM             | ITGB1    | Fibro  | CM 4   |
| S100A1_RYR2  | S100A1          | RYR2     | Fibro  | CM 4   |

Supplemental Table 10. Endothelial Cell Communication to Fibroblasts, Cardiomyocyte Cluster 4 and Cardiomyocyte Cluster 8

| Normal        |          |          |        |        | Non-obstructive |        |          |        |        |
|---------------|----------|----------|--------|--------|-----------------|--------|----------|--------|--------|
| Pair_Name     | Ligand   | Receptor | L_cell | R_cell | Pair_Name       | Ligand | Receptor | L_cell | R_cell |
| A2M_LRP1      | A2M      | LRP1     | EC     | Fibro  | CALM1_RYR2      | CALM1  | RYR2     | EC     | Fibro  |
| APP_LRP1      | APP      | LRP1     | EC     | Fibro  | FN1_ITGB1       | FN1    | ITGB1    | EC     | Fibro  |
| COL1A1_ITGB1  | COL1A1   | ITGB1    | EC     | Fibro  | LGALS1_ITGB1    | LGALS1 | ITGB1    | EC     | Fibro  |
| COL1A2_ITGB1  | COL1A2   | ITGB1    | EC     | Fibro  | S100A1_RYR2     | S100A1 | RYR2     | EC     | Fibro  |
| COL3A1_ITGB1  | COL3A1   | ITGB1    | EC     | Fibro  | CALM1_RYR2      | CALM1  | RYR2     | EC     | CM 4   |
| COL6A1_ITGB1  | COL6A1   | ITGB1    | EC     | Fibro  | FN1_ITGB1       | FN1    | ITGB1    | EC     | CM 4   |
| COL6A2_ITGB1  | COL6A2   | ITGB1    | EC     | Fibro  | LGALS1_ITGB1    | LGALS1 | ITGB1    | EC     | CM 4   |
| FN1_ITGB1     | FN1      | ITGB1    | EC     | Fibro  | S100A1_RYR2     | S100A1 | RYR2     | EC     | CM 4   |
| GNAS_PTGIR    | GNAS     | PTGIR    | EC     | Fibro  | CALM1_CACNA1C   | CALM1  | CACNA1C  | EC     | CM 8   |
| HSP90AA1_LRP1 | HSP90AA1 | LRP1     | EC     | Fibro  | CALM1_RYR2      | CALM1  | RYR2     | EC     | CM 8   |
| HSP90B1_LRP1  | HSP90B1  | LRP1     | EC     | Fibro  | FN1_ITGB1       | FN1    | ITGB1    | EC     | CM 8   |
| HSPG2_ITGB1   | HSPG2    | ITGB1    | EC     | Fibro  | LGALS1_ITGB1    | LGALS1 | ITGB1    | EC     | CM 8   |
| HSPG2_LRP1    | HSPG2    | LRP1     | EC     | Fibro  | S100A1_RYR2     | S100A1 | RYR2     | EC     | CM 8   |
| LGALS1_ITGB1  | LGALS1   | ITGB1    | EC     | Fibro  |                 |        |          |        |        |
| LUM_ITGB1     | LUM      | ITGB1    | EC     | Fibro  |                 |        |          |        |        |
| MFGE8_PDGFBR  | MFGE8    | PDGFBR   | EC     | Fibro  |                 |        |          |        |        |
| PSAP_LRP1     | PSAP     | LRP1     | EC     | Fibro  |                 |        |          |        |        |
| TIMP1_CD63    | TIMP1    | CD63     | EC     | Fibro  |                 |        |          |        |        |
| VWF_LRP1      | VWF      | LRP1     | EC     | Fibro  |                 |        |          |        |        |
| APP_CAV1      | APP      | CAV1     | EC     | CM 4   |                 |        |          |        |        |
| CALM1_CACNA1C | CALM1    | CACNA1C  | EC     | CM 4   |                 |        |          |        |        |
| CALM1_INSR    | CALM1    | INSR     | EC     | CM 4   |                 |        |          |        |        |
| CALM1_RYR2    | CALM1    | RYR2     | EC     | CM 4   |                 |        |          |        |        |
| CALM2_CACNA1C | CALM2    | CACNA1C  | EC     | CM 4   |                 |        |          |        |        |
| CALM2_INSR    | CALM2    | INSR     | EC     | CM 4   |                 |        |          |        |        |
| COL1A1_CD36   | COL1A1   | CD36     | EC     | CM 4   |                 |        |          |        |        |
| COL1A1_ITGB1  | COL1A1   | ITGB1    | EC     | CM 4   |                 |        |          |        |        |
| COL1A2_CD36   | COL1A2   | CD36     | EC     | CM 4   |                 |        |          |        |        |
| COL1A2_ITGB1  | COL1A2   | ITGB1    | EC     | CM 4   |                 |        |          |        |        |
| COL3A1_ITGB1  | COL3A1   | ITGB1    | EC     | CM 4   |                 |        |          |        |        |
| COL6A1_ITGB1  | COL6A1   | ITGB1    | EC     | CM 4   |                 |        |          |        |        |
| COL6A2_ITGB1  | COL6A2   | ITGB1    | EC     | CM 4   |                 |        |          |        |        |
| FN1_ITGB1     | FN1      | ITGB1    | EC     | CM 4   |                 |        |          |        |        |
| HSPG2_ITGB1   | HSPG2    | ITGB1    | EC     | CM 4   |                 |        |          |        |        |
| LGALS1_ITGB1  | LGALS1   | ITGB1    | EC     | CM 4   |                 |        |          |        |        |
| LUM_ITGB1     | LUM      | ITGB1    | EC     | CM 4   |                 |        |          |        |        |
| TIMP1_CD63    | TIMP1    | CD63     | EC     | CM 4   |                 |        |          |        |        |
| CALM1_CACNA1C | CALM1    | CACNA1C  | EC     | CM 8   |                 |        |          |        |        |
| CALM1_INSR    | CALM1    | INSR     | EC     | CM 8   |                 |        |          |        |        |
| CALM1_RYR2    | CALM1    | RYR2     | EC     | CM 8   |                 |        |          |        |        |
| CALM2_CACNA1C | CALM2    | CACNA1C  | EC     | CM 8   |                 |        |          |        |        |
| CALM2_INSR    | CALM2    | INSR     | EC     | CM 8   |                 |        |          |        |        |
| COL1A1_CD36   | COL1A1   | CD36     | EC     | CM 8   |                 |        |          |        |        |
| COL1A1_ITGB1  | COL1A1   | ITGB1    | EC     | CM 8   |                 |        |          |        |        |
| COL1A2_CD36   | COL1A2   | CD36     | EC     | CM 8   |                 |        |          |        |        |
| COL1A2_ITGB1  | COL1A2   | ITGB1    | EC     | CM 8   |                 |        |          |        |        |
| COL3A1_ITGB1  | COL3A1   | ITGB1    | EC     | CM 8   |                 |        |          |        |        |
| COL6A1_ITGB1  | COL6A1   | ITGB1    | EC     | CM 8   |                 |        |          |        |        |
| COL6A2_ITGB1  | COL6A2   | ITGB1    | EC     | CM 8   |                 |        |          |        |        |
| FN1_ITGB1     | FN1      | ITGB1    | EC     | CM 8   |                 |        |          |        |        |
| HSPG2_ITGB1   | HSPG2    | ITGB1    | EC     | CM 8   |                 |        |          |        |        |
| LGALS1_ITGB1  | LGALS1   | ITGB1    | EC     | CM 8   |                 |        |          |        |        |
| LUM_ITGB1     | LUM      | ITGB1    | EC     | CM 8   |                 |        |          |        |        |
| TIMP1_CD63    | TIMP1    | CD63     | EC     | CM 8   |                 |        |          |        |        |

Supplemental Table 11. Cardiomyocyte Cluster 2, 5, Fibroblast and Smooth Muscle Cell Communication to Cardiomyocyte Cluster 9

| Pair_Name   | Normal |          |        |        |
|-------------|--------|----------|--------|--------|
|             | Ligand | Receptor | L_cell | R_cell |
| COL1A2_CD36 | COL1A2 | CD36     | CM 2   | CM 9   |
| TIMP1_CD63  | TIMP1  | CD63     | CM 2   | CM 9   |
| CALM1_RYR2  | CALM1  | RYR2     | CM 5   | CM 9   |
| COL1A2_CD36 | COL1A2 | CD36     | CM 5   | CM 9   |
| S100A1_RYR2 | S100A1 | RYR2     | CM 5   | CM 9   |
| TIMP1_CD63  | TIMP1  | CD63     | CM 5   | CM 9   |
| COL1A1_CD36 | COL1A1 | CD36     | Fibro  | CM 9   |
| COL1A2_CD36 | COL1A2 | CD36     | Fibro  | CM 9   |
| TIMP1_CD63  | TIMP1  | CD63     | Fibro  | CM 9   |
| COL1A2_CD36 | COL1A2 | CD36     | SMC    | CM 9   |
| TIMP1_CD63  | TIMP1  | CD63     | SMC    | CM 9   |

| Pair_Name      | Non-obstructive |          |        |        |
|----------------|-----------------|----------|--------|--------|
|                | Ligand          | Receptor | L_cell | R_cell |
| CALM1_CACNA1C  | CALM1           | CACNA1C  | CM 2   | CM 9   |
| CALM1_PDE1C    | CALM1           | PDE1C    | CM 2   | CM 9   |
| CALM1_RYR2     | CALM1           | RYR2     | CM 2   | CM 9   |
| CALM2_CACNA1C  | CALM2           | CACNA1C  | CM 2   | CM 9   |
| CALM2_PDE1C    | CALM2           | PDE1C    | CM 2   | CM 9   |
| COL1A2_CD36    | COL1A2          | CD36     | CM 2   | CM 9   |
| COL1A2_ITGB1   | COL1A2          | ITGB1    | CM 2   | CM 9   |
| COL6A2_ITGB1   | COL6A2          | ITGB1    | CM 2   | CM 9   |
| FN1_ITGB1      | FN1             | ITGB1    | CM 2   | CM 9   |
| LGALS1_ITGB1   | LGALS1          | ITGB1    | CM 2   | CM 9   |
| LUM_ITGB1      | LUM             | ITGB1    | CM 2   | CM 9   |
| S100A1_RYR2    | S100A1          | RYR2     | CM 2   | CM 9   |
| TIMP1_CD63     | TIMP1           | CD63     | CM 2   | CM 9   |
| CALM1_CACNA1C  | CALM1           | CACNA1C  | CM 5   | CM 9   |
| CALM1_PDE1C    | CALM1           | PDE1C    | CM 5   | CM 9   |
| CALM1_RYR2     | CALM1           | RYR2     | CM 5   | CM 9   |
| CALM2_CACNA1C  | CALM2           | CACNA1C  | CM 5   | CM 9   |
| CALM2_PDE1C    | CALM2           | PDE1C    | CM 5   | CM 9   |
| CALM3_CACNA1C  | CALM3           | CACNA1C  | CM 5   | CM 9   |
| CALM3_PDE1C    | CALM3           | PDE1C    | CM 5   | CM 9   |
| CALM3_RYR2     | CALM3           | RYR2     | CM 5   | CM 9   |
| COL1A2_CD36    | COL1A2          | CD36     | CM 5   | CM 9   |
| COL1A2_ITGB1   | COL1A2          | ITGB1    | CM 5   | CM 9   |
| COL6A1_ITGB1   | COL6A1          | ITGB1    | CM 5   | CM 9   |
| COL6A2_ITGB1   | COL6A2          | ITGB1    | CM 5   | CM 9   |
| FN1_ITGB1      | FN1             | ITGB1    | CM 5   | CM 9   |
| LAMB2_ITGB1    | LAMB2           | ITGB1    | CM 5   | CM 9   |
| LGALS1_ITGB1   | LGALS1          | ITGB1    | CM 5   | CM 9   |
| LGALS3BP_ITGB1 | LGALS3BP        | ITGB1    | CM 5   | CM 9   |
| LUM_ITGB1      | LUM             | ITGB1    | CM 5   | CM 9   |
| S100A1_RYR2    | S100A1          | RYR2     | CM 5   | CM 9   |
| TGM2_ITGB1     | TGM2            | ITGB1    | CM 5   | CM 9   |
| TIMP1_CD63     | TIMP1           | CD63     | CM 5   | CM 9   |
| CALM1_CACNA1C  | CALM1           | CACNA1C  | Fibro  | CM 9   |
| CALM1_PDE1C    | CALM1           | PDE1C    | Fibro  | CM 9   |
| CALM1_RYR2     | CALM1           | RYR2     | Fibro  | CM 9   |
| COL1A2_CD36    | COL1A2          | CD36     | Fibro  | CM 9   |
| COL1A2_ITGB1   | COL1A2          | ITGB1    | Fibro  | CM 9   |
| COL3A1_ITGB1   | COL3A1          | ITGB1    | Fibro  | CM 9   |
| COL4A1_ITGB1   | COL4A1          | ITGB1    | Fibro  | CM 9   |
| COL6A1_ITGB1   | COL6A1          | ITGB1    | Fibro  | CM 9   |
| COL6A2_ITGB1   | COL6A2          | ITGB1    | Fibro  | CM 9   |
| COL6A3_ITGB1   | COL6A3          | ITGB1    | Fibro  | CM 9   |
| FN1_ITGB1      | FN1             | ITGB1    | Fibro  | CM 9   |
| LAMA2_ITGB1    | LAMA2           | ITGB1    | Fibro  | CM 9   |
| LGALS1_ITGB1   | LGALS1          | ITGB1    | Fibro  | CM 9   |
| LUM_ITGB1      | LUM             | ITGB1    | Fibro  | CM 9   |
| S100A1_RYR2    | S100A1          | RYR2     | Fibro  | CM 9   |
| CALM1_CACNA1C  | CALM1           | CACNA1C  | SMC    | CM 9   |
| CALM1_PDE1C    | CALM1           | PDE1C    | SMC    | CM 9   |
| CALM1_RYR2     | CALM1           | RYR2     | SMC    | CM 9   |
| CALM2_CACNA1C  | CALM2           | CACNA1C  | SMC    | CM 9   |
| CALM2_PDE1C    | CALM2           | PDE1C    | SMC    | CM 9   |
| COL1A2_CD36    | COL1A2          | CD36     | SMC    | CM 9   |
| COL1A2_ITGB1   | COL1A2          | ITGB1    | SMC    | CM 9   |
| COL4A1_ITGB1   | COL4A1          | ITGB1    | SMC    | CM 9   |
| COL6A1_ITGB1   | COL6A1          | ITGB1    | SMC    | CM 9   |
| COL6A2_ITGB1   | COL6A2          | ITGB1    | SMC    | CM 9   |
| FN1_ITGB1      | FN1             | ITGB1    | SMC    | CM 9   |
| LGALS1_ITGB1   | LGALS1          | ITGB1    | SMC    | CM 9   |
| S100A1_RYR2    | S100A1          | RYR2     | SMC    | CM 9   |

Supplemental Table 12. Cardiomyocyte Cluster 5 Communication to Dendritic Cells

| <i>Normal</i> |        |          |        |        |
|---------------|--------|----------|--------|--------|
| Pair_Name     | Ligand | Receptor | L_cell | R_cell |
| COL1A2_CD36   | COL1A2 | CD36     | CM 5   | DC     |
| LGALS1_PTPRC  | LGALS1 | PTPRC    | CM 5   | DC     |
| TIMP1_CD63    | TIMP1  | CD63     | CM 5   | DC     |

| <i>Non-obstructive</i> |          |          |        |        |
|------------------------|----------|----------|--------|--------|
| Pair_Name              | Ligand   | Receptor | L_cell | R_cell |
| CALM1_RYR2             | CALM1    | RYR2     | CM 5   | DC     |
| CALM3_RYR2             | CALM3    | RYR2     | CM 5   | DC     |
| COL1A2_CD36            | COL1A2   | CD36     | CM 5   | DC     |
| COL1A2_ITGB1           | COL1A2   | ITGB1    | CM 5   | DC     |
| COL6A1_ITGB1           | COL6A1   | ITGB1    | CM 5   | DC     |
| COL6A2_ITGB1           | COL6A2   | ITGB1    | CM 5   | DC     |
| FN1_ITGB1              | FN1      | ITGB1    | CM 5   | DC     |
| LAMB2_ITGB1            | LAMB2    | ITGB1    | CM 5   | DC     |
| LGALS1_ITGB1           | LGALS1   | ITGB1    | CM 5   | DC     |
| LGALS3BP_ITGB1         | LGALS3BP | ITGB1    | CM 5   | DC     |
| LUM_ITGB1              | LUM      | ITGB1    | CM 5   | DC     |
| MIF_CD74               | MIF      | CD74     | CM 5   | DC     |
| S100A1_RYR2            | S100A1   | RYR2     | CM 5   | DC     |
| TGM2_ITGB1             | TGM2     | ITGB1    | CM 5   | DC     |
| TIMP1_CD63             | TIMP1    | CD63     | CM 5   | DC     |



Supplemental Table 14. Increased Communication From Fibroblast and Cardiomyocyte Subtypes to Cardiomyocyte Cluster 9

| Pair_Name   | Normal |          |         |        |
|-------------|--------|----------|---------|--------|
|             | Ligand | Receptor | L_cell  | R_cell |
| COL1A1_CD36 | COL1A1 | CD36     | Fibro 1 | CM 9   |
| COL1A2_CD36 | COL1A2 | CD36     | Fibro 1 | CM 9   |
| TIMP1_CD63  | TIMP1  | CD63     | Fibro 1 | CM 9   |
| COL1A1_CD36 | COL1A1 | CD36     | Fibro 2 | CM 9   |
| COL1A2_CD36 | COL1A2 | CD36     | Fibro 2 | CM 9   |
| THBS2_CD36  | THBS2  | CD36     | Fibro 2 | CM 9   |
| TIMP1_CD63  | TIMP1  | CD63     | Fibro 2 | CM 9   |
| COL1A2_CD36 | COL1A2 | CD36     | Fibro 3 | CM 9   |
| TIMP1_CD63  | TIMP1  | CD63     | Fibro 3 | CM 9   |
| COL1A1_CD36 | COL1A1 | CD36     | Fibro 4 | CM 9   |
| COL1A2_CD36 | COL1A2 | CD36     | Fibro 4 | CM 9   |
| TIMP1_CD63  | TIMP1  | CD63     | Fibro 4 | CM 9   |
| COL1A1_CD36 | COL1A1 | CD36     | Fibro 5 | CM 9   |
| COL1A2_CD36 | COL1A2 | CD36     | Fibro 5 | CM 9   |
| TIMP1_CD63  | TIMP1  | CD63     | Fibro 5 | CM 9   |
| COL1A2_CD36 | COL1A2 | CD36     | CM 2    | CM 9   |
| TIMP1_CD63  | TIMP1  | CD63     | CM 2    | CM 9   |
| COL1A2_CD36 | COL1A2 | CD36     | CM 3    | CM 9   |
| TIMP1_CD63  | TIMP1  | CD63     | CM 3    | CM 9   |
| CALM1_RYR2  | CALM1  | RYR2     | CM 5    | CM 9   |
| COL1A2_CD36 | COL1A2 | CD36     | CM 5    | CM 9   |
| S100A1_RYR2 | S100A1 | RYR2     | CM 5    | CM 9   |
| TIMP1_CD63  | TIMP1  | CD63     | CM 5    | CM 9   |

| Pair_Name      | Non-obstructive |          |         |        |
|----------------|-----------------|----------|---------|--------|
|                | Ligand          | Receptor | L_cell  | R_cell |
| CALM1_CACNA1C  | CALM1           | CACNA1C  | Fibro 1 | CM 9   |
| CALM1_PDE1C    | CALM1           | PDE1C    | Fibro 1 | CM 9   |
| CALM1_RYR2     | CALM1           | RYR2     | Fibro 1 | CM 9   |
| COL1A2_CD36    | COL1A2          | CD36     | Fibro 1 | CM 9   |
| COL1A2_ITGB1   | COL1A2          | ITGB1    | Fibro 1 | CM 9   |
| COL4A1_ITGB1   | COL4A1          | ITGB1    | Fibro 1 | CM 9   |
| COL6A1_ITGB1   | COL6A1          | ITGB1    | Fibro 1 | CM 9   |
| COL6A2_ITGB1   | COL6A2          | ITGB1    | Fibro 1 | CM 9   |
| COL6A3_ITGB1   | COL6A3          | ITGB1    | Fibro 1 | CM 9   |
| FN1_ITGB1      | FN1             | ITGB1    | Fibro 1 | CM 9   |
| LAMA2_ITGB1    | LAMA2           | ITGB1    | Fibro 1 | CM 9   |
| LGALS1_ITGB1   | LGALS1          | ITGB1    | Fibro 1 | CM 9   |
| LUM_ITGB1      | LUM             | ITGB1    | Fibro 1 | CM 9   |
| S100A1_RYR2    | S100A1          | RYR2     | Fibro 1 | CM 9   |
| CALM1_CACNA1C  | CALM1           | CACNA1C  | Fibro 2 | CM 9   |
| CALM1_PDE1C    | CALM1           | PDE1C    | Fibro 2 | CM 9   |
| CALM1_RYR2     | CALM1           | RYR2     | Fibro 2 | CM 9   |
| CALM2_CACNA1C  | CALM2           | CACNA1C  | Fibro 2 | CM 9   |
| CALM2_PDE1C    | CALM2           | PDE1C    | Fibro 2 | CM 9   |
| COL1A1_CD36    | COL1A1          | CD36     | Fibro 2 | CM 9   |
| COL1A1_ITGB1   | COL1A1          | ITGB1    | Fibro 2 | CM 9   |
| COL1A2_CD36    | COL1A2          | CD36     | Fibro 2 | CM 9   |
| COL1A2_ITGB1   | COL1A2          | ITGB1    | Fibro 2 | CM 9   |
| COL3A1_ITGB1   | COL3A1          | ITGB1    | Fibro 2 | CM 9   |
| COL4A1_ITGB1   | COL4A1          | ITGB1    | Fibro 2 | CM 9   |
| COL6A1_ITGB1   | COL6A1          | ITGB1    | Fibro 2 | CM 9   |
| COL6A2_ITGB1   | COL6A2          | ITGB1    | Fibro 2 | CM 9   |
| COL6A3_ITGB1   | COL6A3          | ITGB1    | Fibro 2 | CM 9   |
| FN1_ITGB1      | FN1             | ITGB1    | Fibro 2 | CM 9   |
| LAMA2_ITGB1    | LAMA2           | ITGB1    | Fibro 2 | CM 9   |
| LAMB1_ITGB1    | LAMB1           | ITGB1    | Fibro 2 | CM 9   |
| LGALS1_ITGB1   | LGALS1          | ITGB1    | Fibro 2 | CM 9   |
| LUM_ITGB1      | LUM             | ITGB1    | Fibro 2 | CM 9   |
| S100A1_RYR2    | S100A1          | RYR2     | Fibro 2 | CM 9   |
| TIMP1_CD63     | TIMP1           | CD63     | Fibro 2 | CM 9   |
| TIMP2_ITGB1    | TIMP2           | ITGB1    | Fibro 2 | CM 9   |
| VCAN_ITGB1     | VCAN            | ITGB1    | Fibro 2 | CM 9   |
| CALM1_CACNA1C  | CALM1           | CACNA1C  | Fibro 3 | CM 9   |
| CALM1_PDE1C    | CALM1           | PDE1C    | Fibro 3 | CM 9   |
| CALM1_RYR2     | CALM1           | RYR2     | Fibro 3 | CM 9   |
| COL1A2_CD36    | COL1A2          | CD36     | Fibro 3 | CM 9   |
| COL1A2_ITGB1   | COL1A2          | ITGB1    | Fibro 3 | CM 9   |
| COL3A1_ITGB1   | COL3A1          | ITGB1    | Fibro 3 | CM 9   |
| COL4A1_ITGB1   | COL4A1          | ITGB1    | Fibro 3 | CM 9   |
| COL6A1_ITGB1   | COL6A1          | ITGB1    | Fibro 3 | CM 9   |
| COL6A2_ITGB1   | COL6A2          | ITGB1    | Fibro 3 | CM 9   |
| COL6A3_ITGB1   | COL6A3          | ITGB1    | Fibro 3 | CM 9   |
| FN1_ITGB1      | FN1             | ITGB1    | Fibro 3 | CM 9   |
| LAMA2_ITGB1    | LAMA2           | ITGB1    | Fibro 3 | CM 9   |
| LAMB1_ITGB1    | LAMB1           | ITGB1    | Fibro 3 | CM 9   |
| LGALS1_ITGB1   | LGALS1          | ITGB1    | Fibro 3 | CM 9   |
| LUM_ITGB1      | LUM             | ITGB1    | Fibro 3 | CM 9   |
| S100A1_RYR2    | S100A1          | RYR2     | Fibro 3 | CM 9   |
| CALM1_CACNA1C  | CALM1           | CACNA1C  | Fibro 4 | CM 9   |
| CALM1_PDE1C    | CALM1           | PDE1C    | Fibro 4 | CM 9   |
| CALM1_RYR2     | CALM1           | RYR2     | Fibro 4 | CM 9   |
| COL1A2_CD36    | COL1A2          | CD36     | Fibro 4 | CM 9   |
| COL1A2_ITGB1   | COL1A2          | ITGB1    | Fibro 4 | CM 9   |
| COL4A1_ITGB1   | COL4A1          | ITGB1    | Fibro 4 | CM 9   |
| COL6A1_ITGB1   | COL6A1          | ITGB1    | Fibro 4 | CM 9   |
| COL6A3_ITGB1   | COL6A3          | ITGB1    | Fibro 4 | CM 9   |
| FN1_ITGB1      | FN1             | ITGB1    | Fibro 4 | CM 9   |
| LGALS1_ITGB1   | LGALS1          | ITGB1    | Fibro 4 | CM 9   |
| LUM_ITGB1      | LUM             | ITGB1    | Fibro 4 | CM 9   |
| S100A1_RYR2    | S100A1          | RYR2     | Fibro 4 | CM 9   |
| CALM1_CACNA1C  | CALM1           | CACNA1C  | Fibro 5 | CM 9   |
| CALM1_PDE1C    | CALM1           | PDE1C    | Fibro 5 | CM 9   |
| CALM1_RYR2     | CALM1           | RYR2     | Fibro 5 | CM 9   |
| COL1A2_CD36    | COL1A2          | CD36     | Fibro 5 | CM 9   |
| COL1A2_ITGB1   | COL1A2          | ITGB1    | Fibro 5 | CM 9   |
| COL4A1_ITGB1   | COL4A1          | ITGB1    | Fibro 5 | CM 9   |
| COL6A1_ITGB1   | COL6A1          | ITGB1    | Fibro 5 | CM 9   |
| COL6A2_ITGB1   | COL6A2          | ITGB1    | Fibro 5 | CM 9   |
| COL6A3_ITGB1   | COL6A3          | ITGB1    | Fibro 5 | CM 9   |
| FN1_ITGB1      | FN1             | ITGB1    | Fibro 5 | CM 9   |
| LGALS1_ITGB1   | LGALS1          | ITGB1    | Fibro 5 | CM 9   |
| LUM_ITGB1      | LUM             | ITGB1    | Fibro 5 | CM 9   |
| S100A1_RYR2    | S100A1          | RYR2     | Fibro 5 | CM 9   |
| CALM1_CACNA1C  | CALM1           | CACNA1C  | CM 2    | CM 9   |
| CALM1_PDE1C    | CALM1           | PDE1C    | CM 2    | CM 9   |
| CALM1_RYR2     | CALM1           | RYR2     | CM 2    | CM 9   |
| CALM2_CACNA1C  | CALM2           | CACNA1C  | CM 2    | CM 9   |
| CALM2_PDE1C    | CALM2           | PDE1C    | CM 2    | CM 9   |
| COL1A2_CD36    | COL1A2          | CD36     | CM 2    | CM 9   |
| COL1A2_ITGB1   | COL1A2          | ITGB1    | CM 2    | CM 9   |
| COL6A2_ITGB1   | COL6A2          | ITGB1    | CM 2    | CM 9   |
| FN1_ITGB1      | FN1             | ITGB1    | CM 2    | CM 9   |
| LGALS1_ITGB1   | LGALS1          | ITGB1    | CM 2    | CM 9   |
| LUM_ITGB1      | LUM             | ITGB1    | CM 2    | CM 9   |
| S100A1_RYR2    | S100A1          | RYR2     | CM 2    | CM 9   |
| TIMP1_CD63     | TIMP1           | CD63     | CM 2    | CM 9   |
| CALM1_CACNA1C  | CALM1           | CACNA1C  | CM 3    | CM 9   |
| CALM1_PDE1C    | CALM1           | PDE1C    | CM 3    | CM 9   |
| CALM1_RYR2     | CALM1           | RYR2     | CM 3    | CM 9   |
| CALM2_CACNA1C  | CALM2           | CACNA1C  | CM 3    | CM 9   |
| CALM2_PDE1C    | CALM2           | PDE1C    | CM 3    | CM 9   |
| LAMA2_ITGB1    | LAMA2           | ITGB1    | CM 3    | CM 9   |
| LGALS1_ITGB1   | LGALS1          | ITGB1    | CM 3    | CM 9   |
| NCAM1_CACNA1C  | NCAM1           | CACNA1C  | CM 3    | CM 9   |
| S100A1_RYR2    | S100A1          | RYR2     | CM 3    | CM 9   |
| TGM2_ITGB1     | TGM2            | ITGB1    | CM 3    | CM 9   |
| VEGFA_ITGB1    | VEGFA           | ITGB1    | CM 3    | CM 9   |
| CALM1_CACNA1C  | CALM1           | CACNA1C  | CM 5    | CM 9   |
| CALM1_PDE1C    | CALM1           | PDE1C    | CM 5    | CM 9   |
| CALM1_RYR2     | CALM1           | RYR2     | CM 5    | CM 9   |
| CALM2_CACNA1C  | CALM2           | CACNA1C  | CM 5    | CM 9   |
| CALM2_PDE1C    | CALM2           | PDE1C    | CM 5    | CM 9   |
| CALM3_CACNA1C  | CALM3           | CACNA1C  | CM 5    | CM 9   |
| CALM3_PDE1C    | CALM3           | PDE1C    | CM 5    | CM 9   |
| CALM3_RYR2     | CALM3           | RYR2     | CM 5    | CM 9   |
| COL1A2_CD36    | COL1A2          | CD36     | CM 5    | CM 9   |
| COL1A2_ITGB1   | COL1A2          | ITGB1    | CM 5    | CM 9   |
| COL6A1_ITGB1   | COL6A1          | ITGB1    | CM 5    | CM 9   |
| COL6A2_ITGB1   | COL6A2          | ITGB1    | CM 5    | CM 9   |
| FN1_ITGB1      | FN1             | ITGB1    | CM 5    | CM 9   |
| LAMB2_ITGB1    | LAMB2           | ITGB1    | CM 5    | CM 9   |
| LGALS1_ITGB1   | LGALS1          | ITGB1    | CM 5    | CM 9   |
| LGALS3BP_ITGB1 | LGALS3BP        | ITGB1    | CM 5    | CM 9   |
| LUM_ITGB1      | LUM             | ITGB1    | CM 5    | CM 9   |
| S100A1_RYR2    | S100A1          | RYR2     | CM 5    | CM 9   |
| TGM2_ITGB1     | TGM2            | ITGB1    | CM 5    | CM 9   |
| TIMP1_CD63     | TIMP1           | CD63     | CM 5    | CM 9   |
